# Supplementary material for: General and efficient synthesis of benzoxazol-2(3H)-ones: evolution of their anti-cancer and anti-mycobacterial activities
Source: Royal Society of Chemistry journal article supplement (doi:10.1039/c4ra07123a), 2014-01-01

## I. Copies of $^1\text{H}$ and $^{13}\text{C}$ NMR, and MS spectra for compounds 6a-6x

### Spectra of compounds 6a-x

Figure 1: (6a)

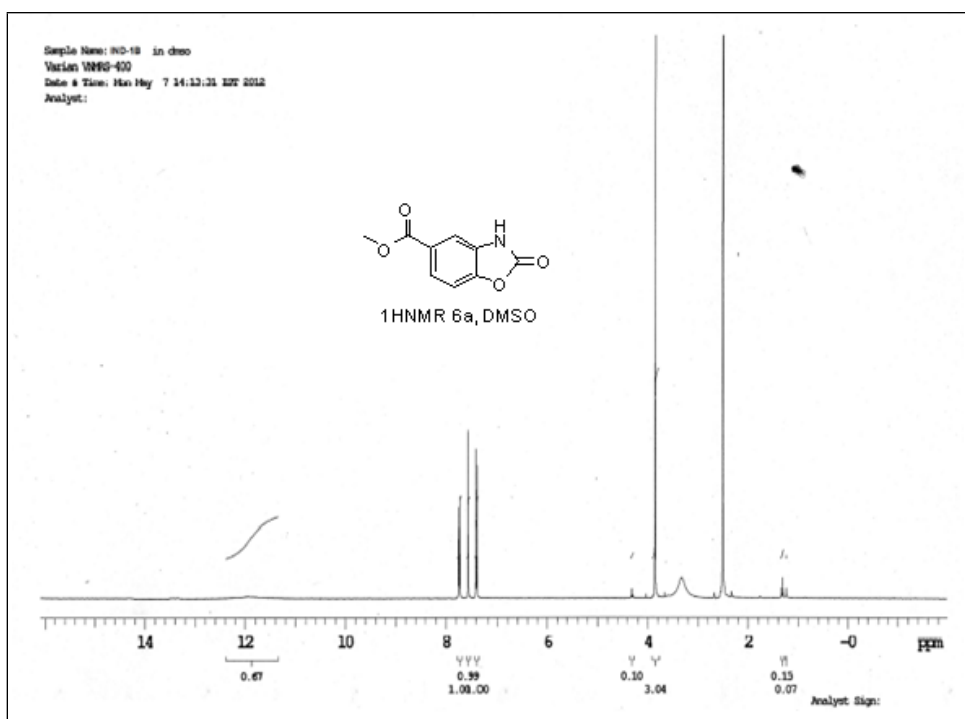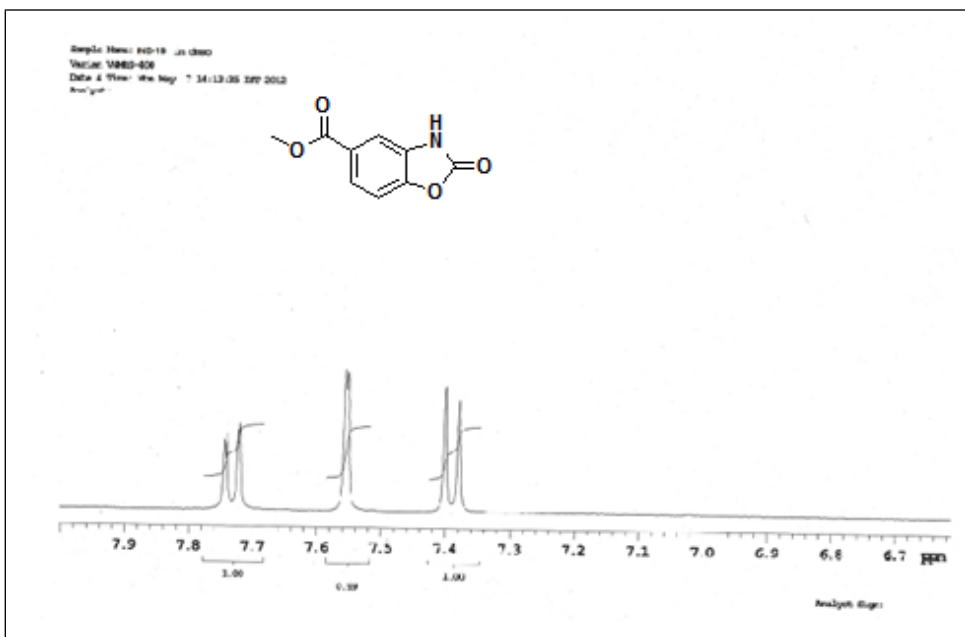

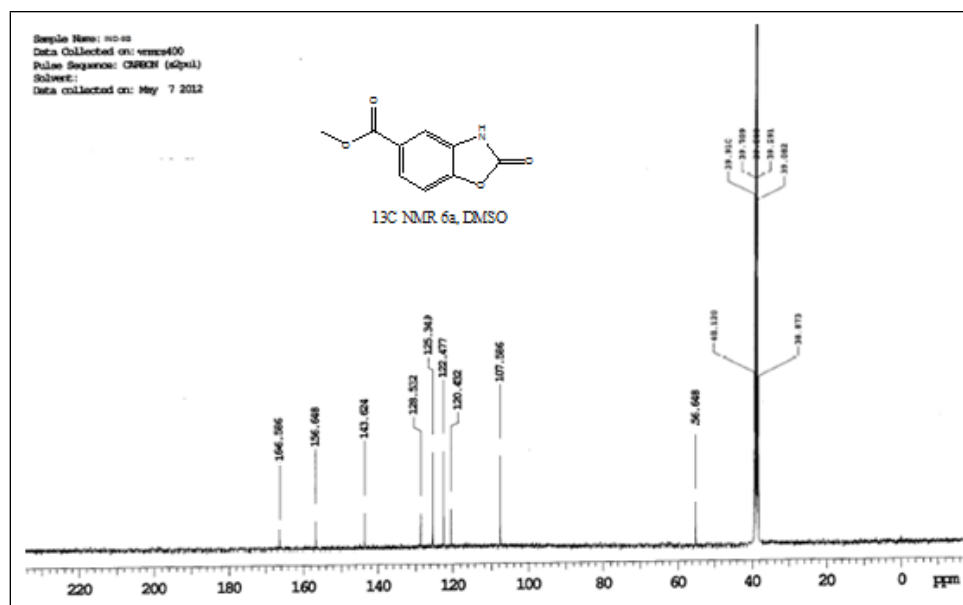

Figure 2: (6b)

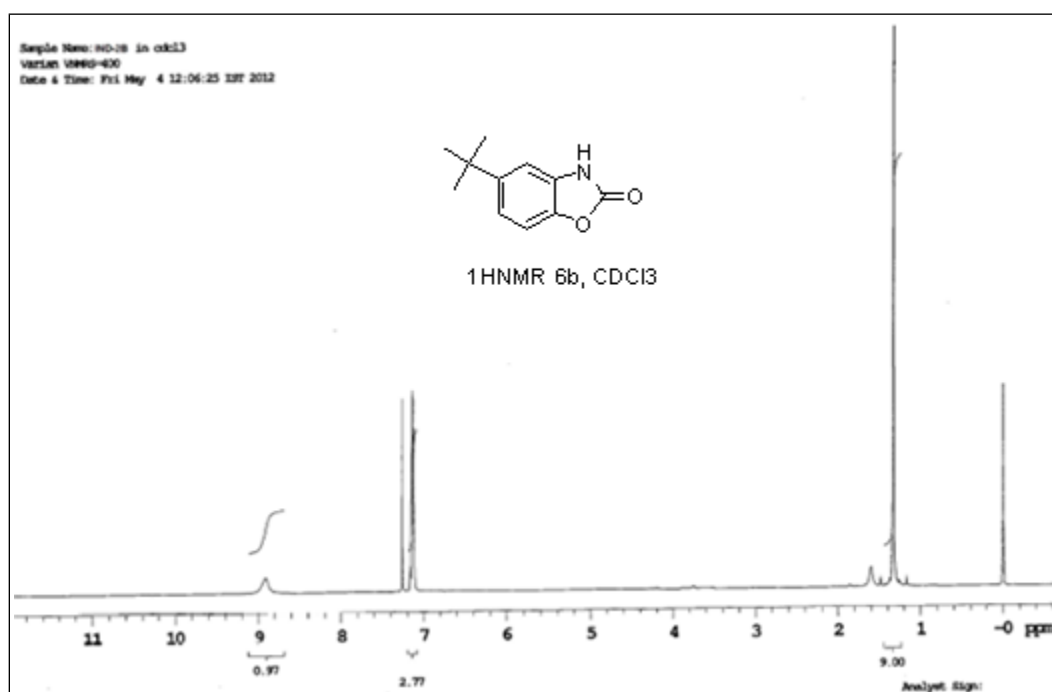

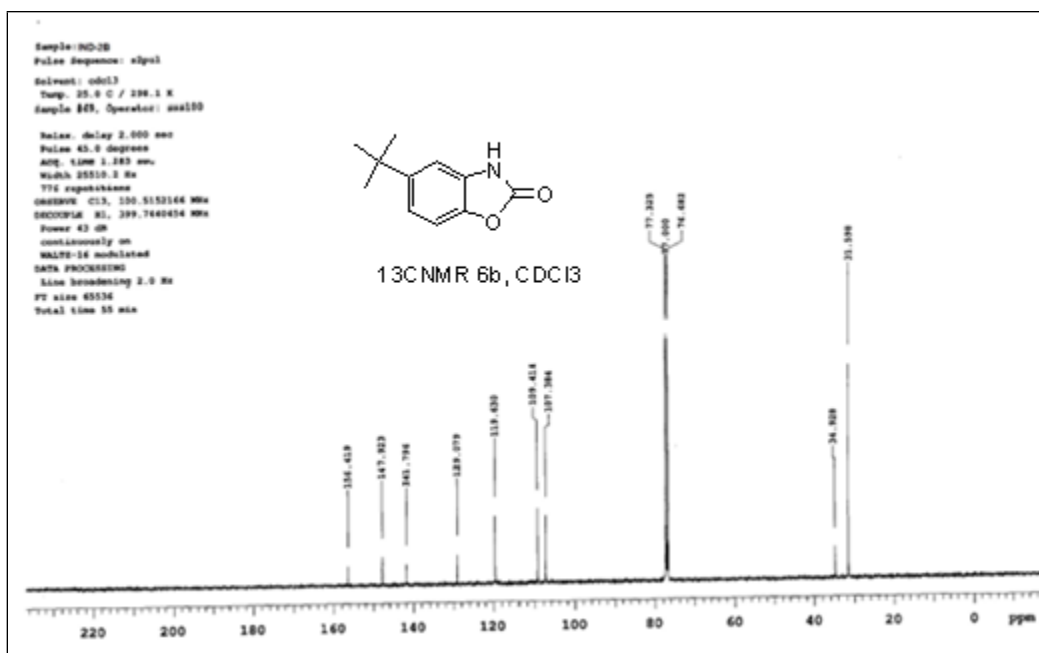

Figure 3: (6c)

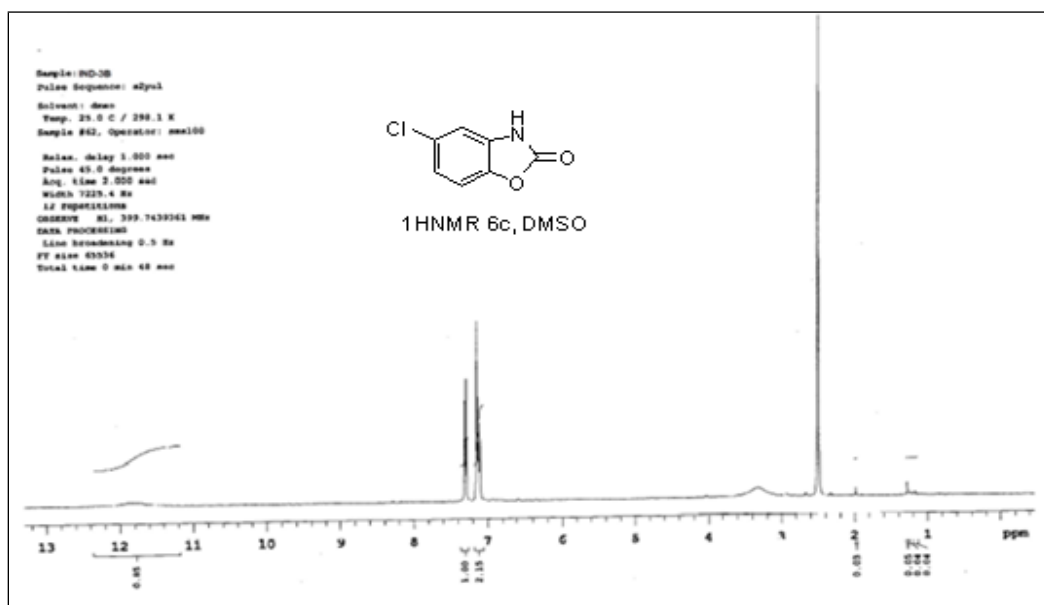

Sample: IND18  
Date Acquired: 09-11  
Solvent: Acet  
Temp: 28.0 C / 392.1 K  
Sample #AZ, Concentr: 0.0101

Relax. delay 1.000 sec  
Pulse 45.0 degrees  
Acq. time 2.000 sec  
Width: 7525.4 Hz  
12 repetitions  
nu000000 01, 200, 543963 MHz  
DATA PROCESSING  
Line broadening 0.3 Hz  
SI size 65034  
Total time 0 min 48 sec

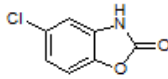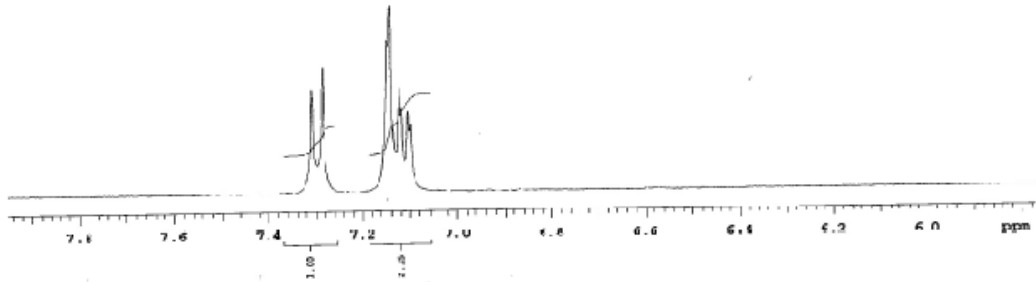

Sample Name: IND18  
Date Collected: 09-11-2012  
Pulse Sequence: CPMAS (qcp1)  
Solvent: cdcl3  
Date collected on: May 16 2012

Temp: 25.0 C / 299.1 K  
Operator: rsm1  
Relax. delay 3.000 sec  
Pulse 45.0 degrees  
Acq. time 1.310 sec  
Width: 25000.0 Hz  
6574 repetitions  
nu000000 01, 100, 531432 MHz  
nu000000 02, 100, 531432 MHz  
Power 18 dB  
continuously on  
WALTZ-16 modulated  
DATA PROCESSING  
Line broadening 3.0 Hz  
SI size 45534  
Total time 12 hr, 38 min

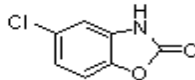

<sup>13</sup>CNMR 6c, CDCl<sub>3</sub>

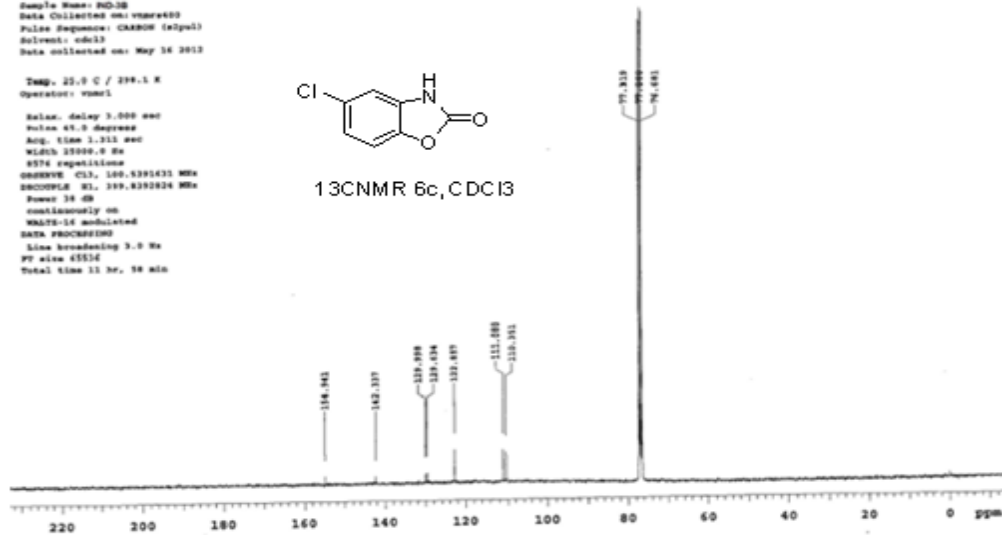

Figure 4: (6d)

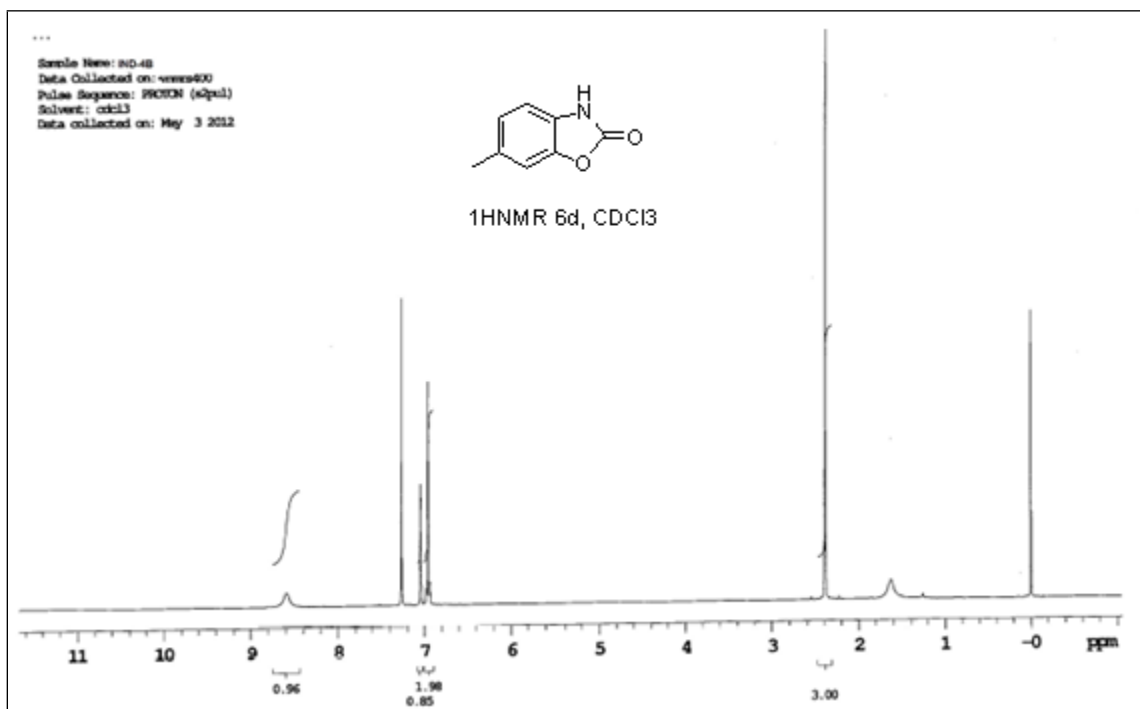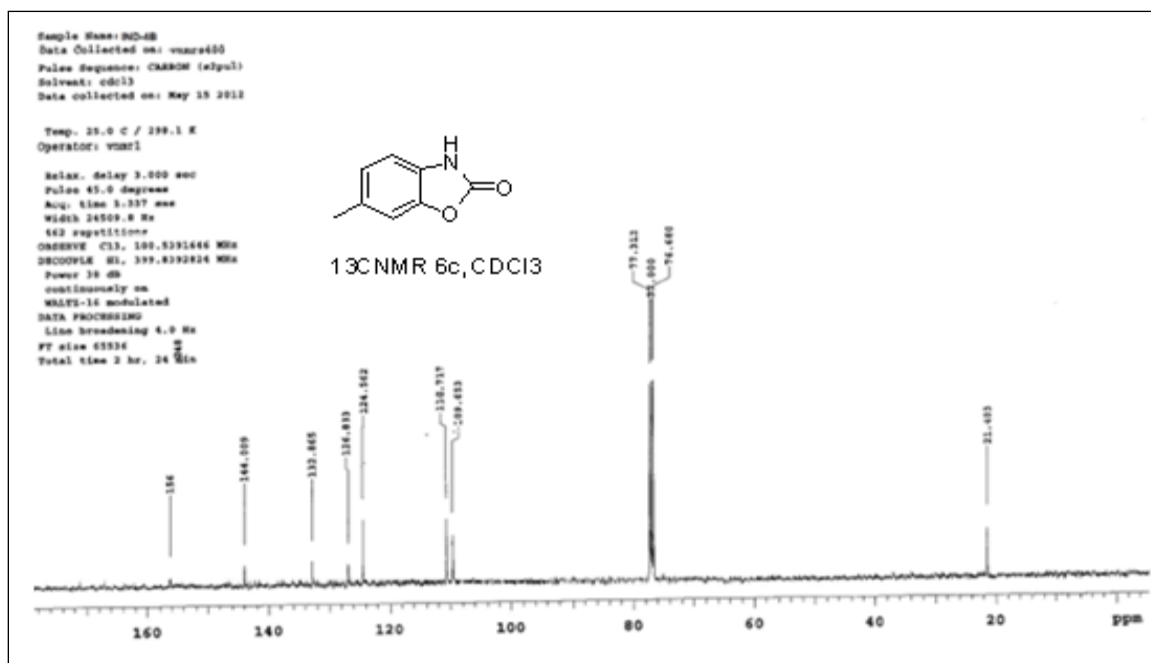

Figure 5: (6e)

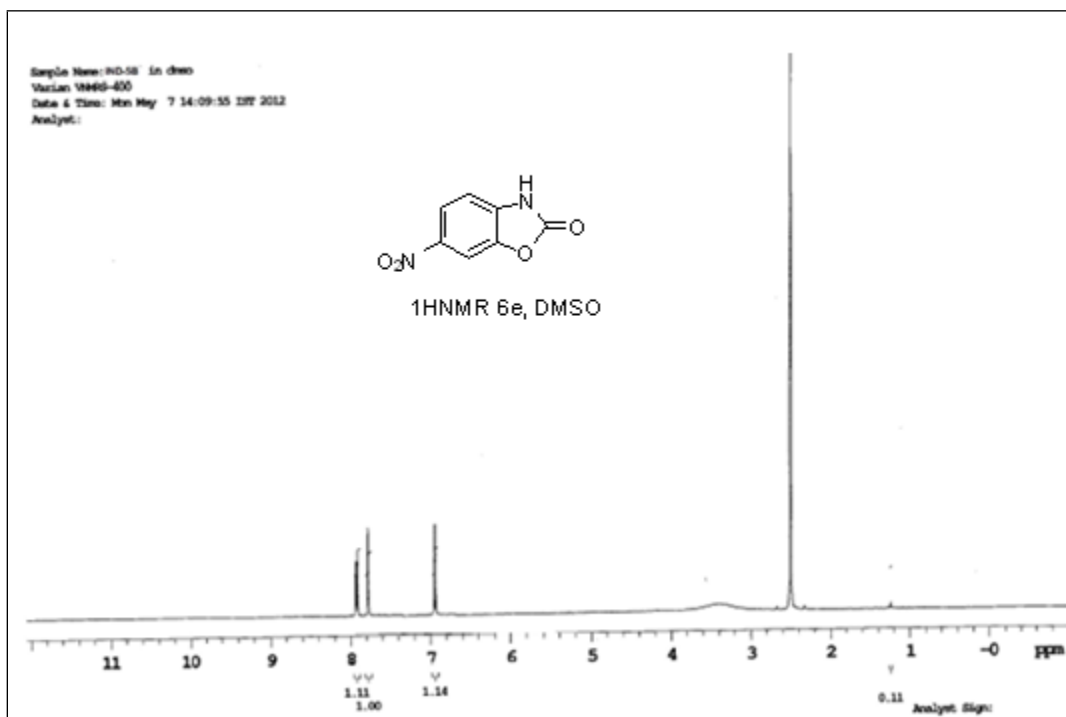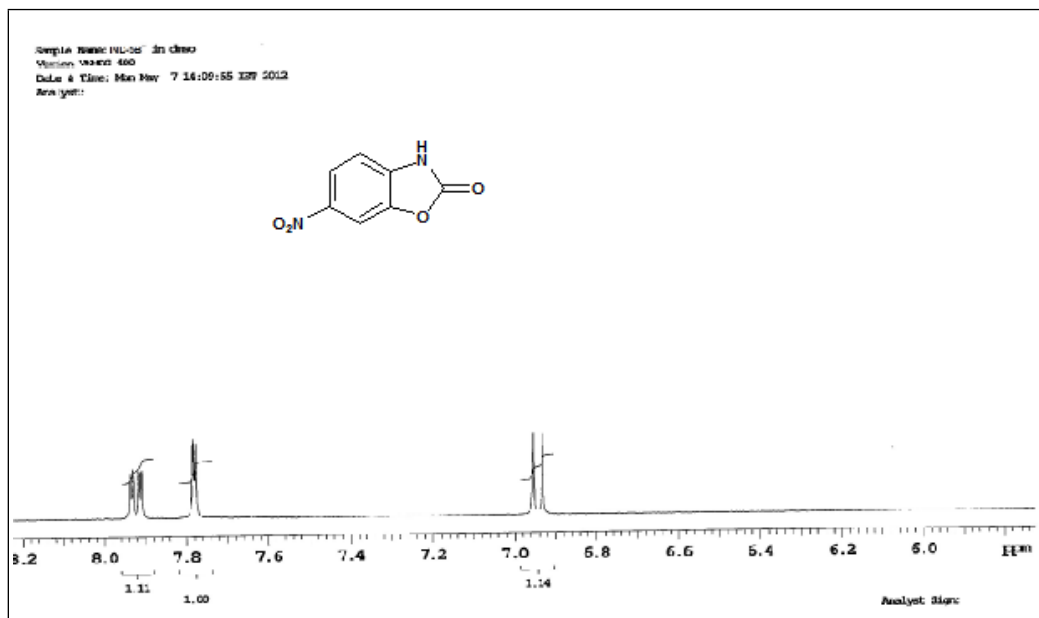

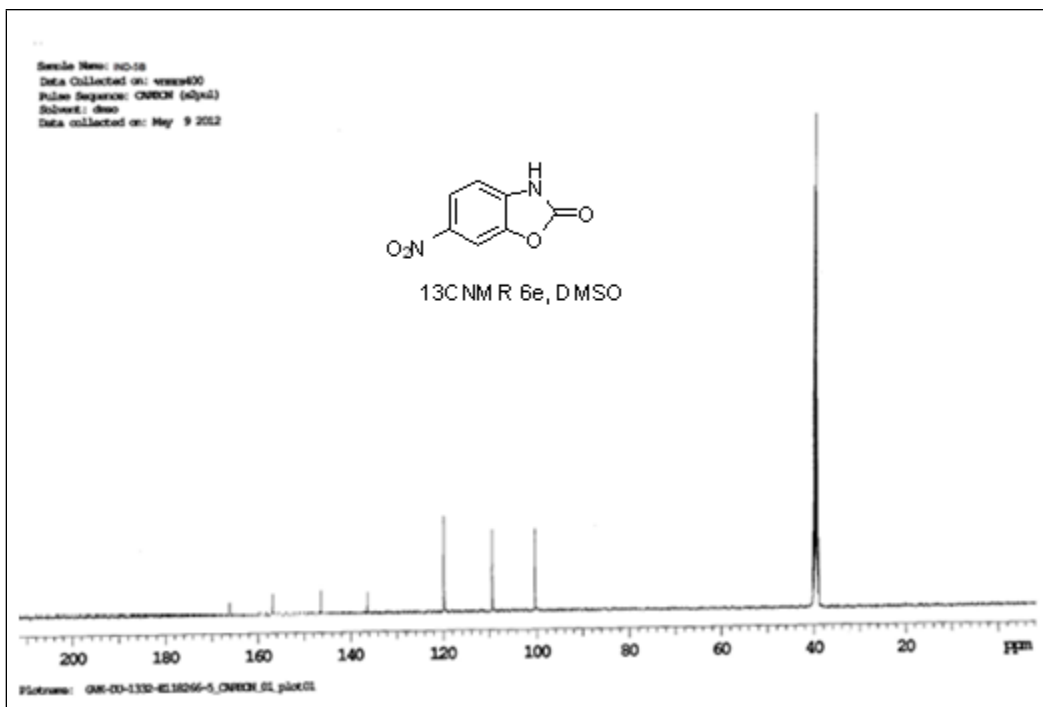

Figure 6: (6f)

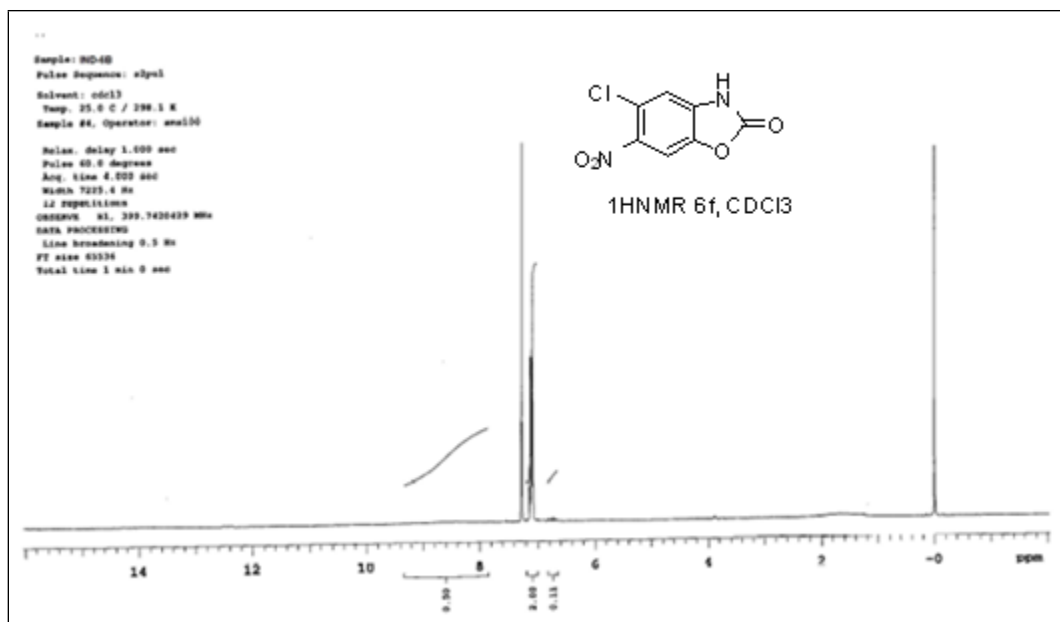

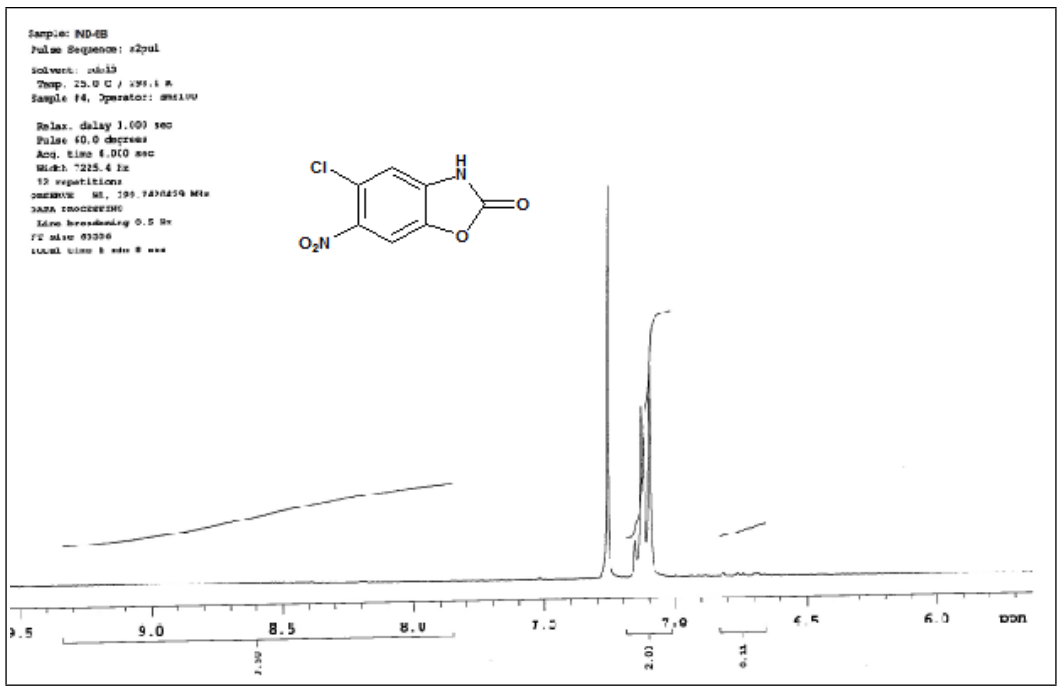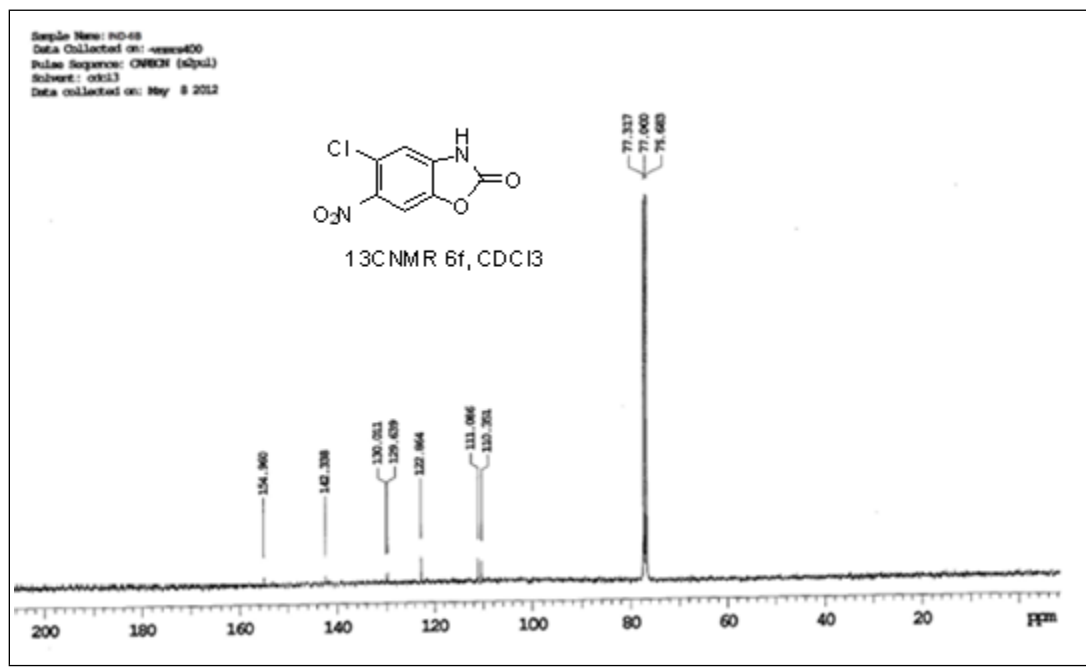



Figure 7: (6g)

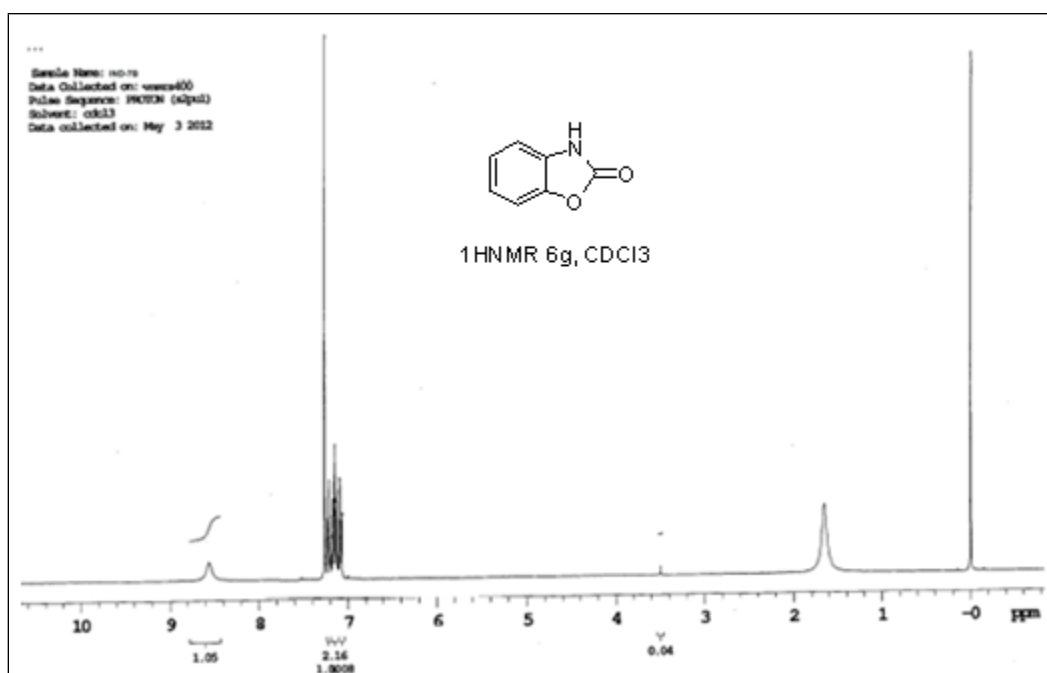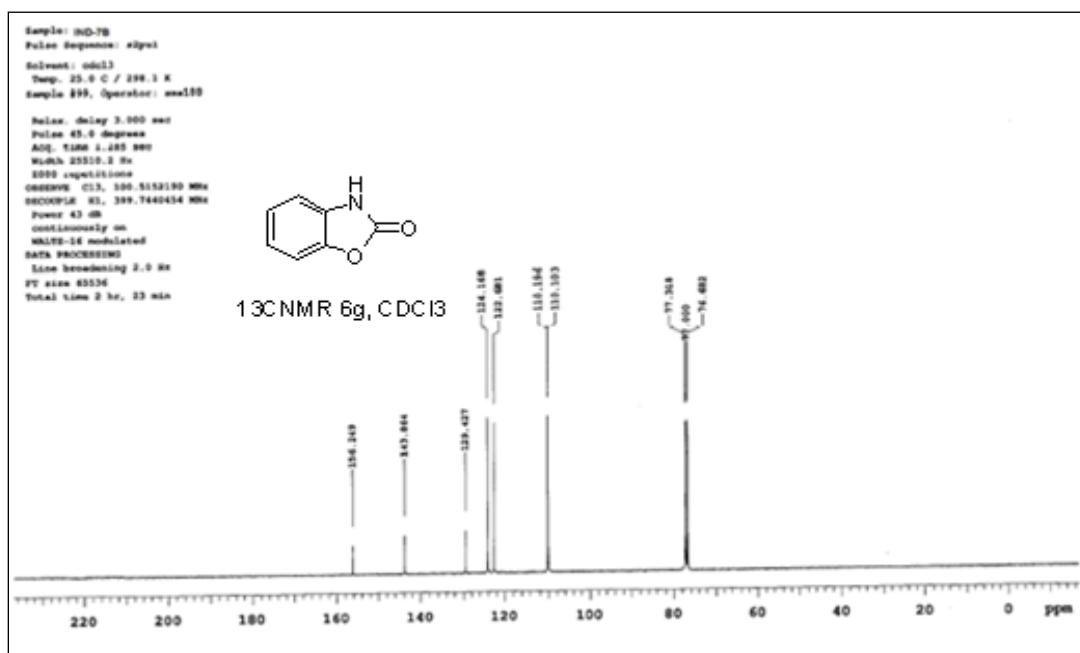

Figure 8: (6h)

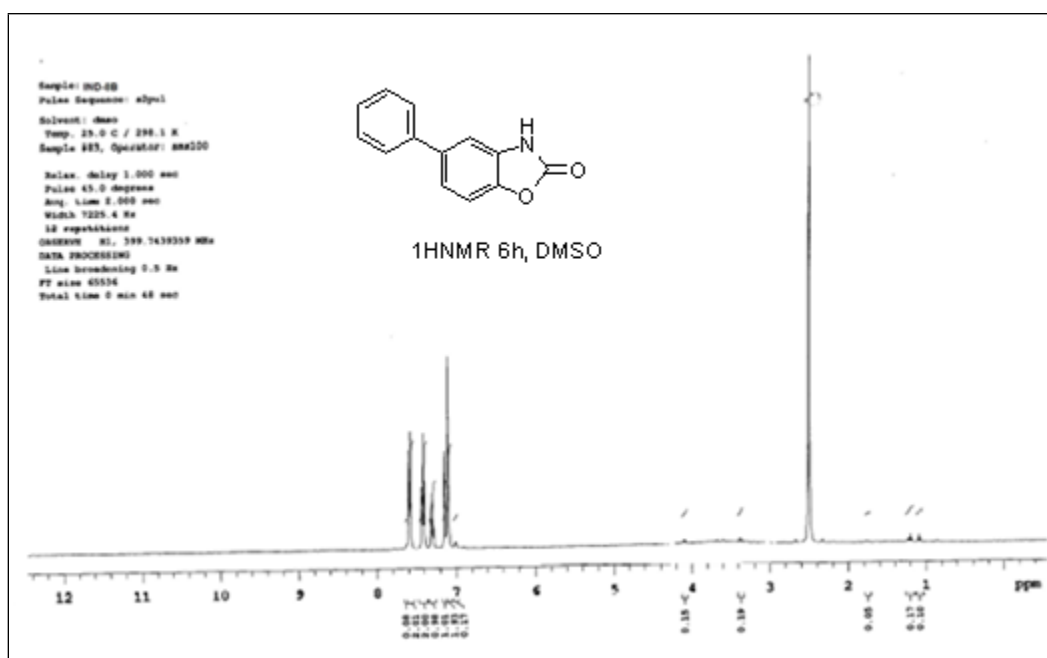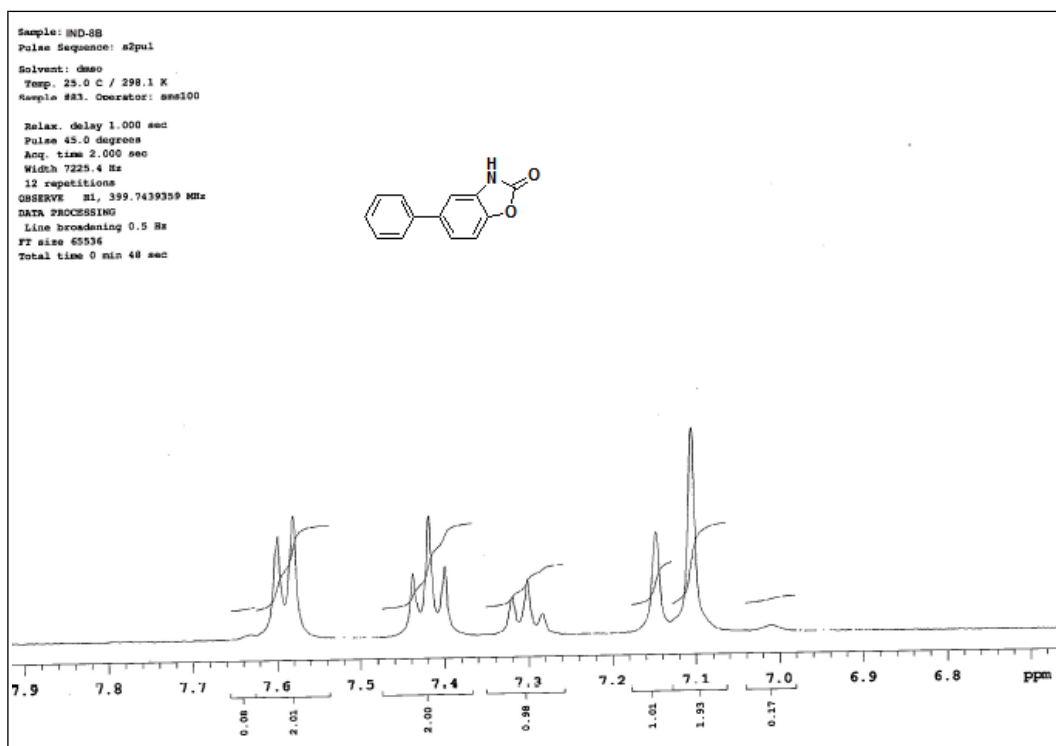

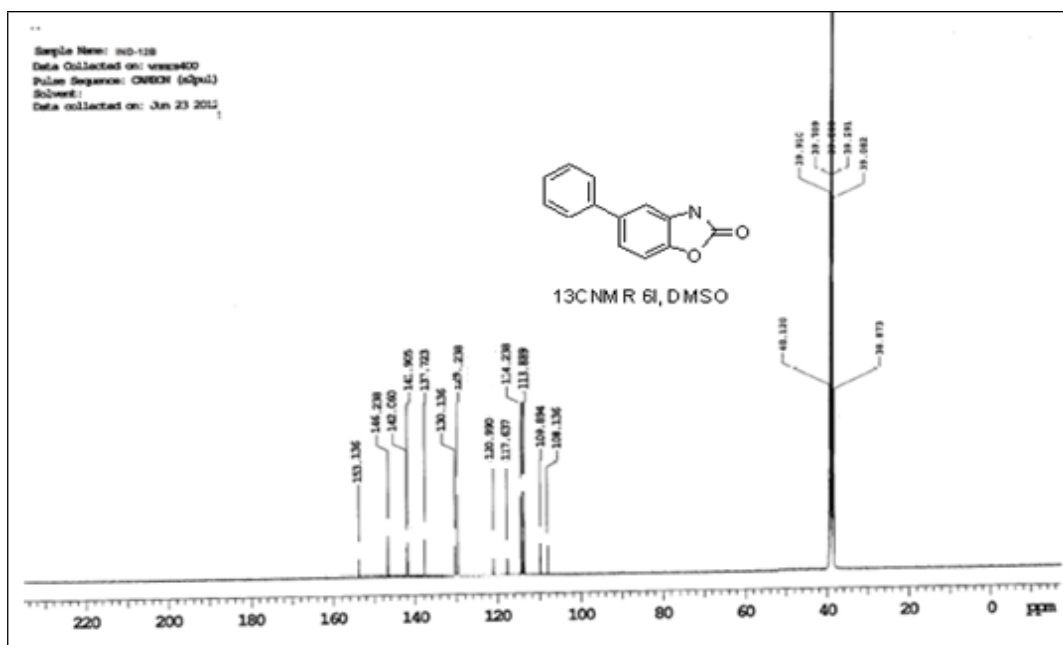

Figure 9: (6i)

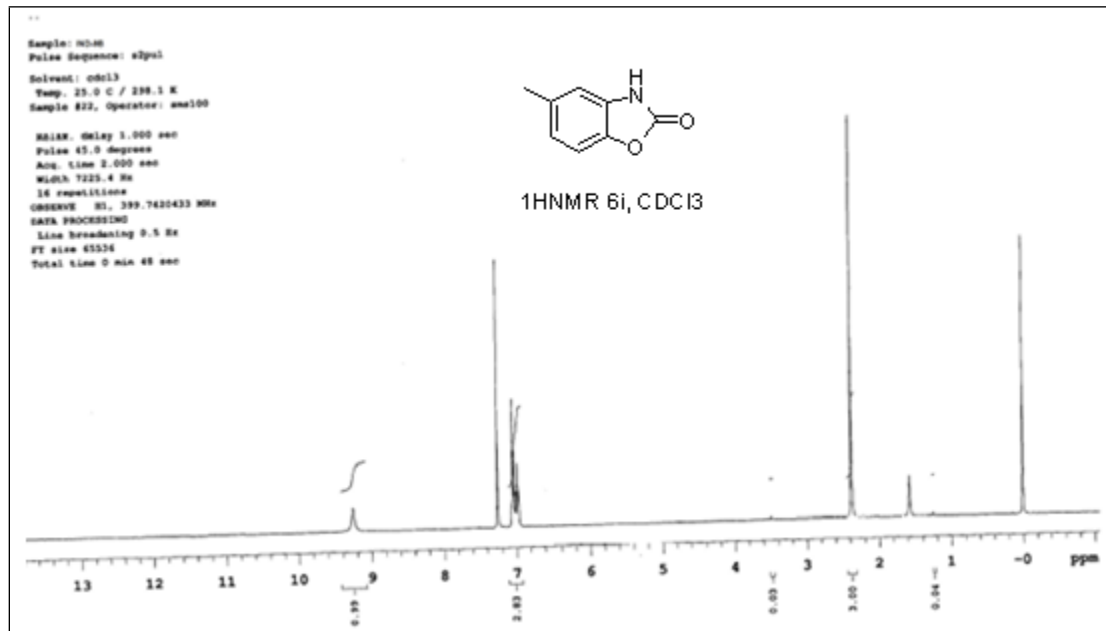

Sample Name: 0000  
Pulse Sequence: zgpg30  
Solvent: cdcl3  
Temp: 29.0 C / 130.1 K  
Sample Size, Operator: anal04

Relax. delay 1.000 sec  
Pulse 45.0 degree  
Acq. Time 2.090 sec  
Width 1225.4 Hz  
16 repetitions  
OBSERVE HI, 199.748000 MHz  
DATA PROCESSING  
Line broadening 0.5 Hz  
FT size 65536  
Total time 0 min 48 sec

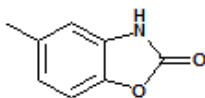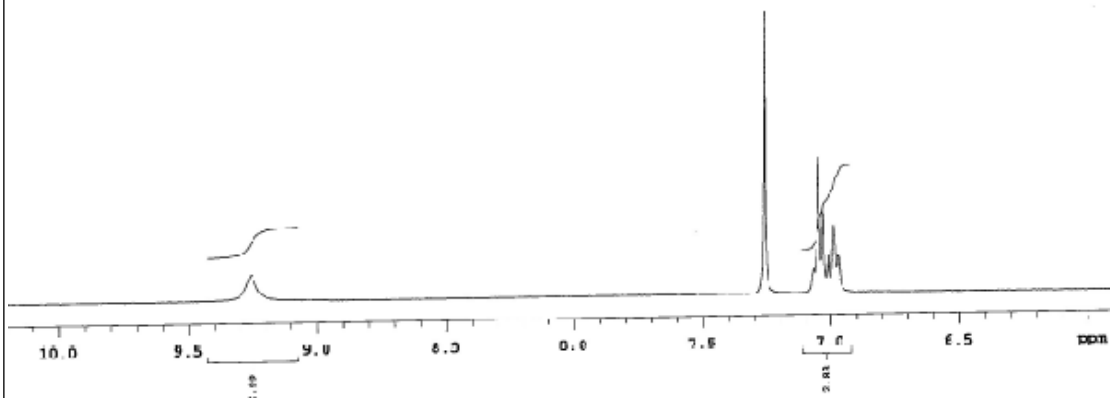

Sample Name: 0000  
Data Collected on: vnmr400  
Pulse Sequence: zgpg30  
Solvent: cdcl3  
Data collected on: May 7 2012

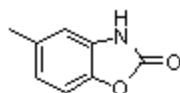

<sup>13</sup>C NMR 61, CDCl<sub>3</sub>

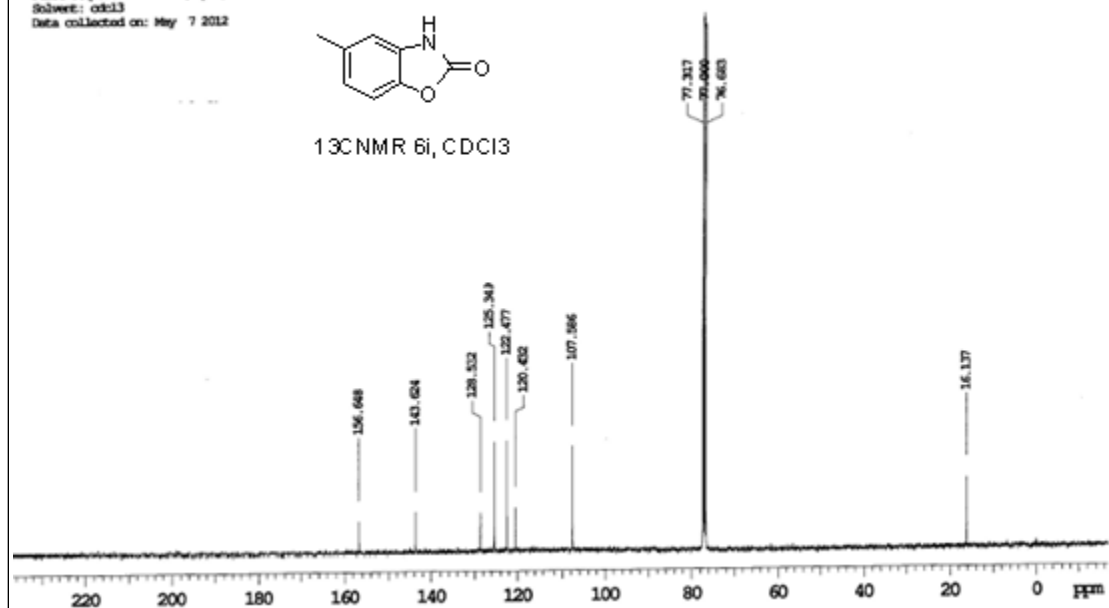

Figure 10: (6j)

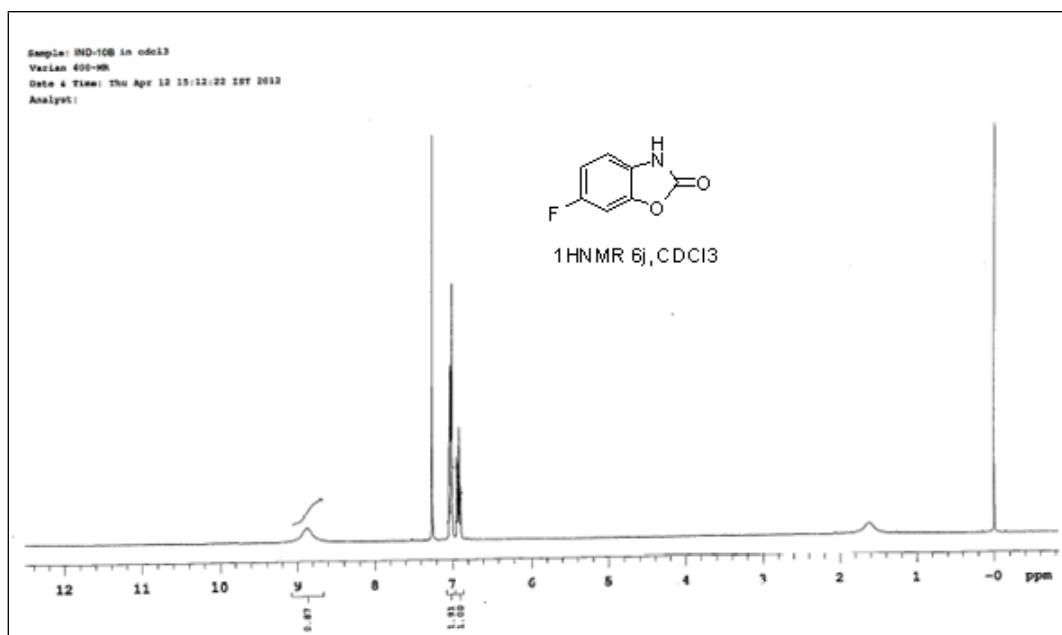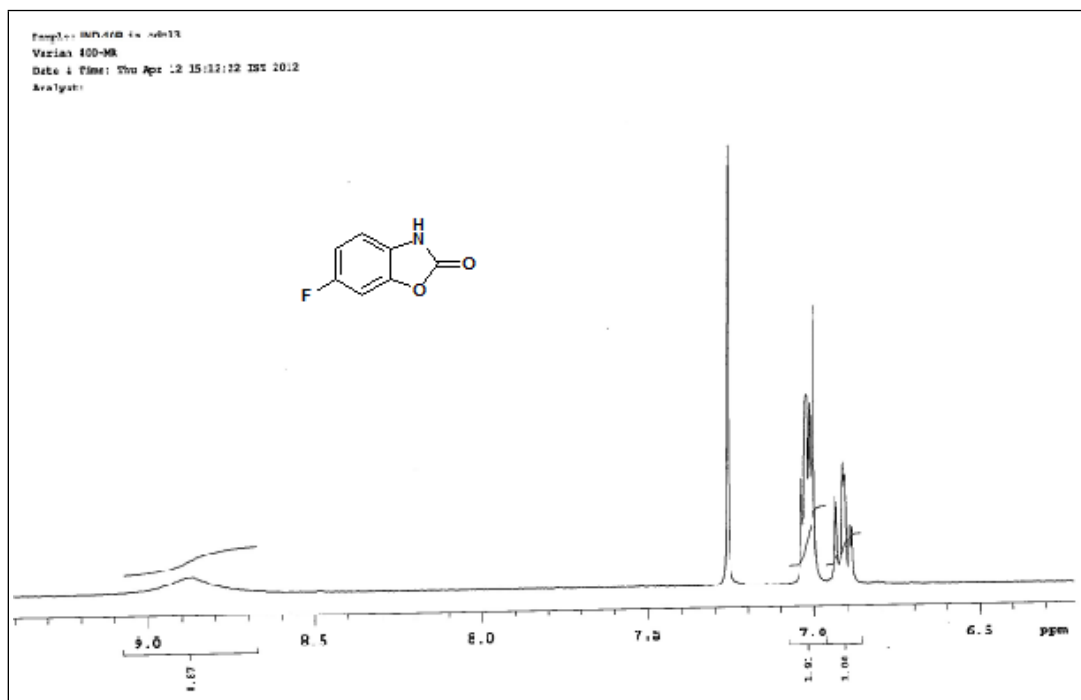

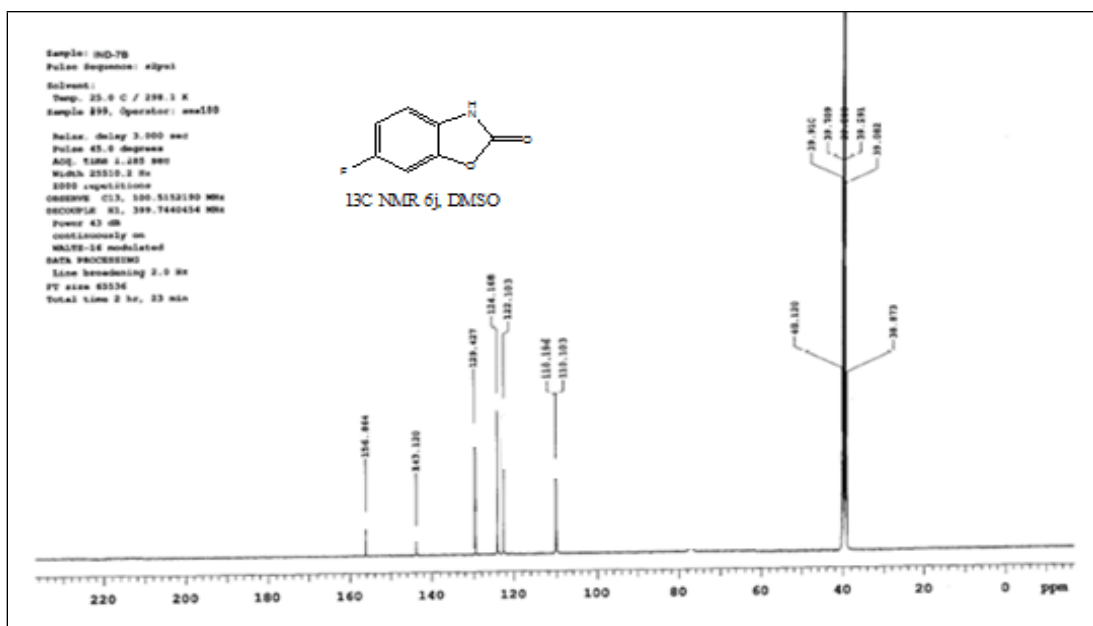

Figure 11: (6k)

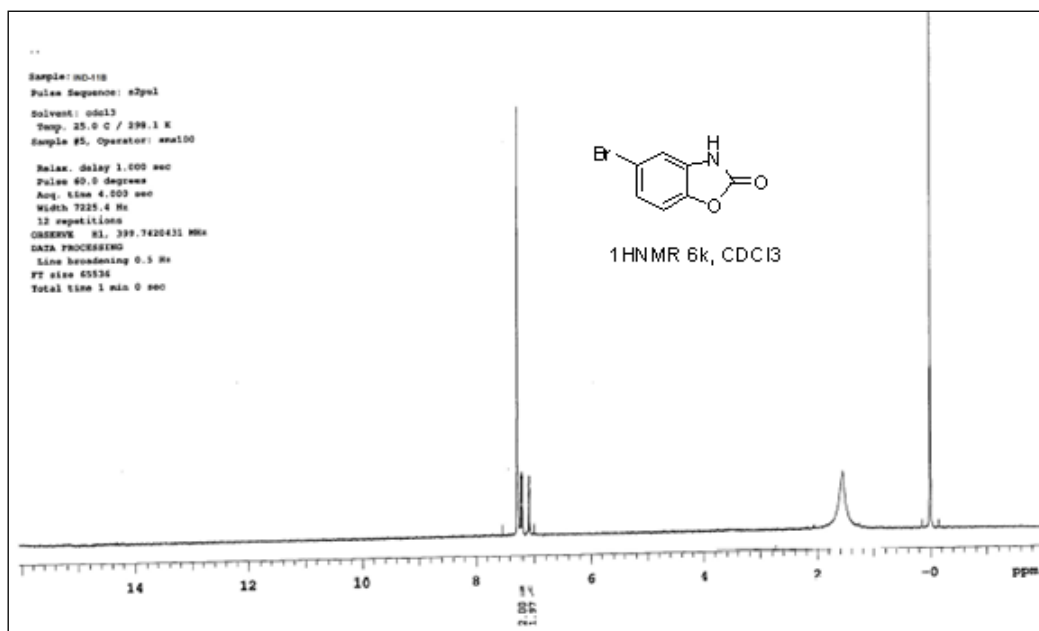

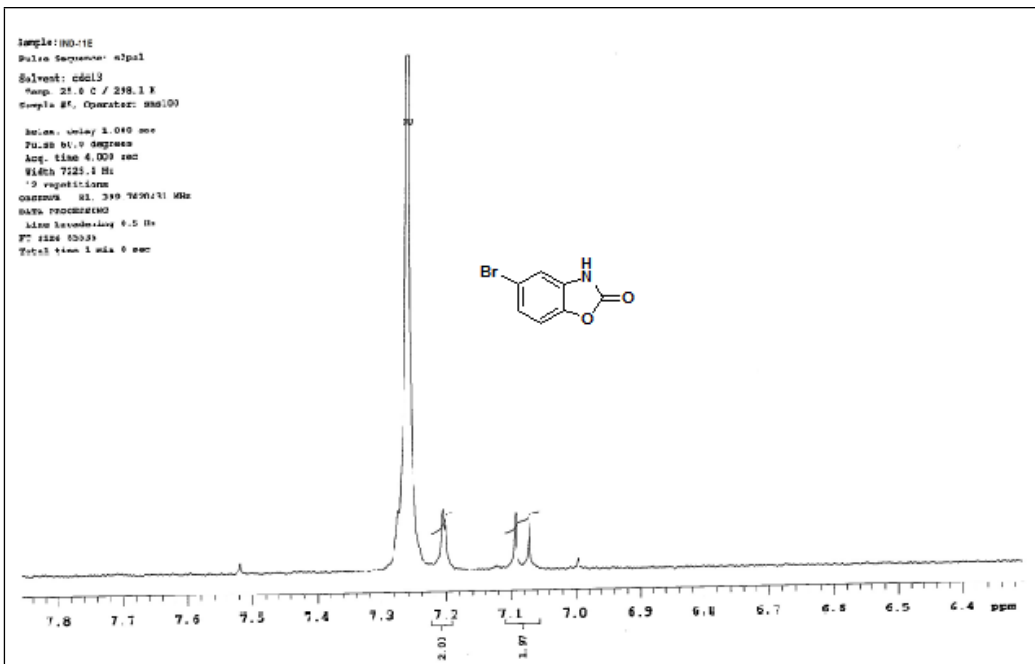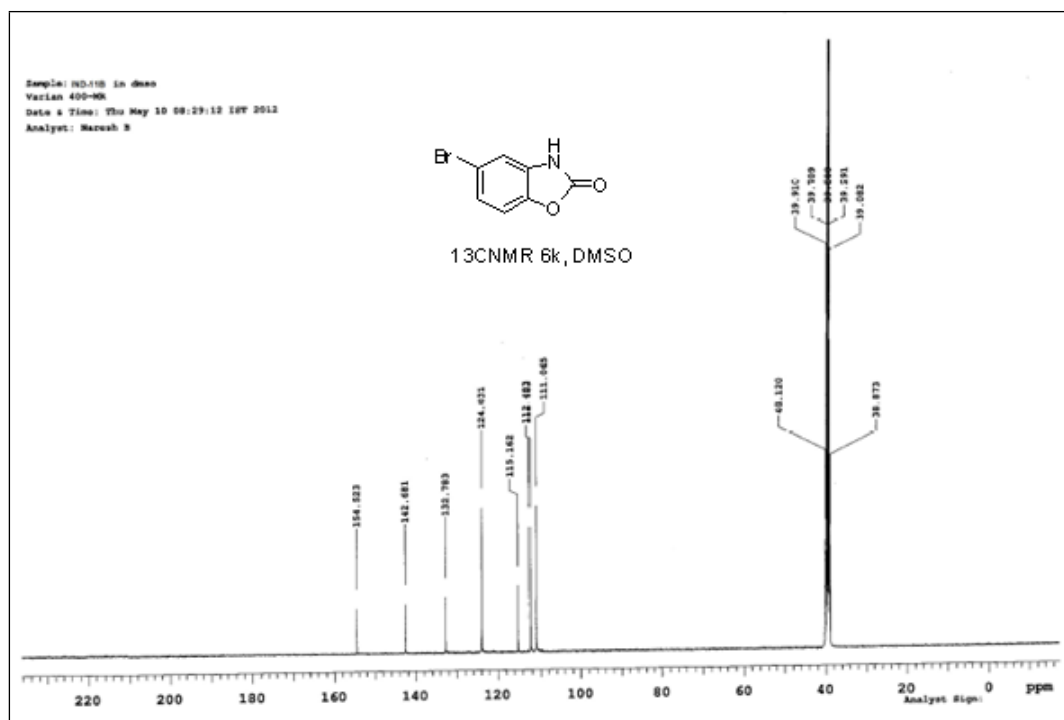

Figure 12: (61)

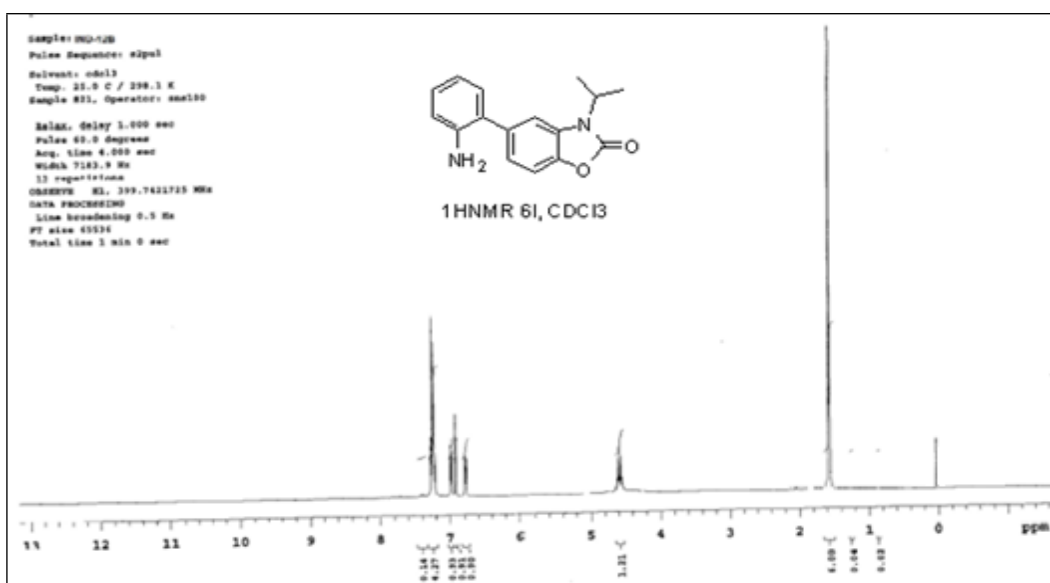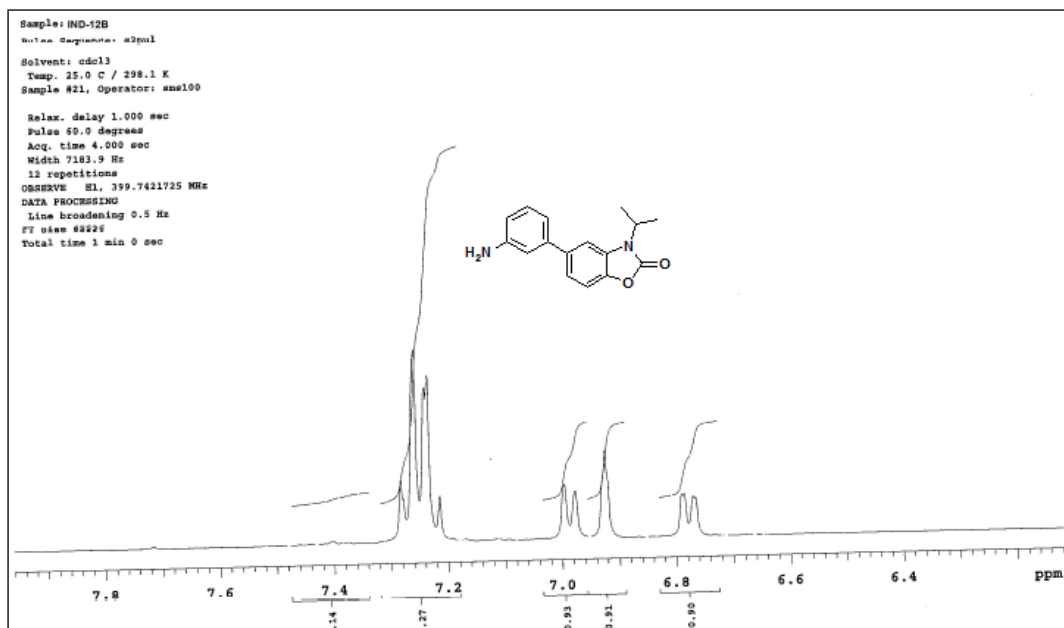



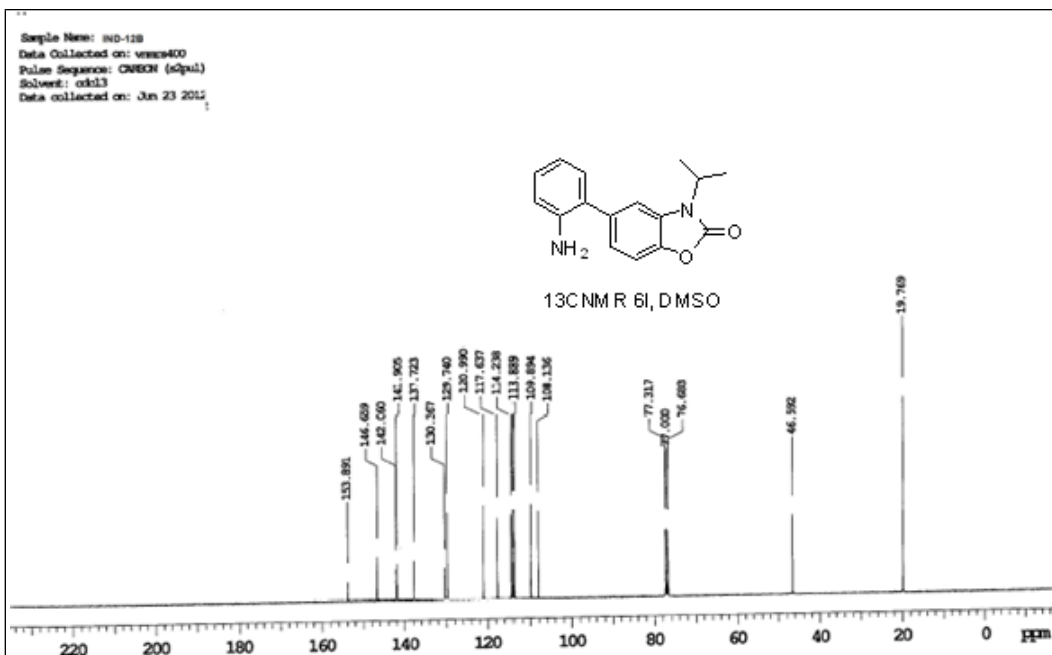

Figure 13: (6m)

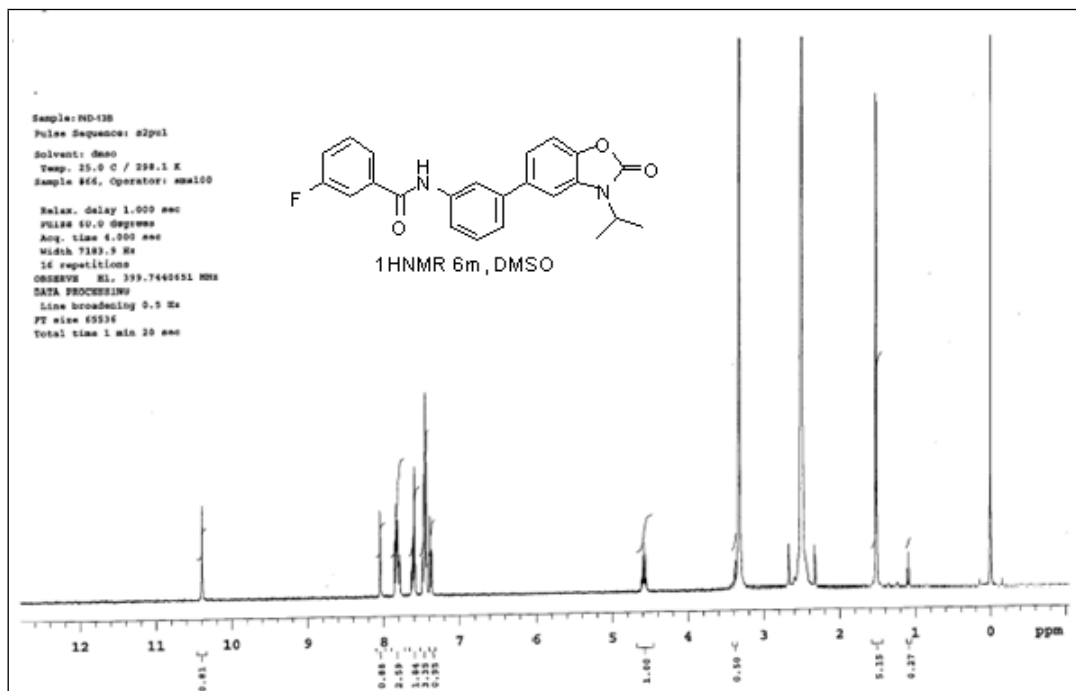

Sample: ND-128  
 Pulse Sequence: s2pul  
 Solvent: dmsc  
 Temp: 25.0 C / 298.1 K  
 Sample #65, Operator: am100

Relax. delay 1.000 sec  
 Pulse 40.0 degrees  
 Acq. time 4.000 sec  
 Width 7193.9 Hz  
 16 repetitions  
 OBSERVE H1, 399.7440651 MHz  
 DATA PROCESSING  
 Line broadening 0.5 Hz  
 FT size 65536  
 Total time 1 min 20 sec

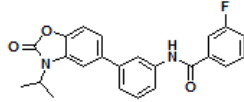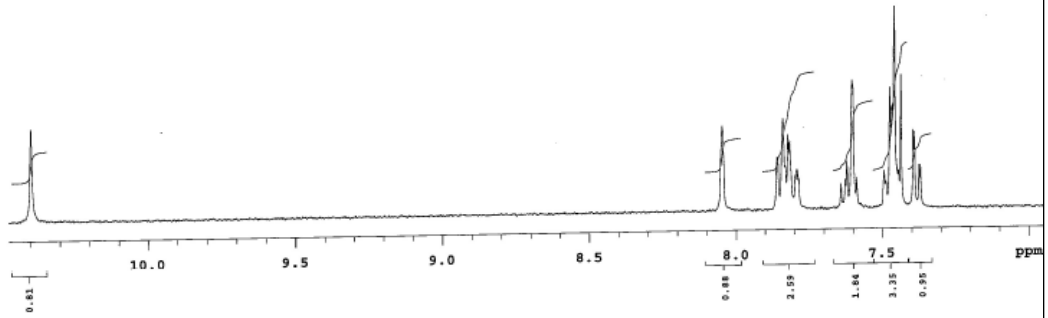

Sample: ND-128  
 Pulse Sequence: s2pul  
 Solvent: dmsc  
 Temp: 25.0 C / 298.1 K  
 Sample #53, Operator: am100

Relax. delay 3.000 sec  
 Pulse 45.0 degrees  
 Acq. time 1.331 sec  
 Width 25000.0 Hz  
 3200 repetitions  
 OBSERVE C13, 100.625702 MHz  
 PROCURE H1, 399.7460712 MHz  
 PPMWZ 43 dB  
 continuously on  
 WALTZ-16 modulated  
 DATA PROCESSING  
 Line broadening 2.0 Hz  
 FT size 65536  
 Total time 1 hr, 24 min

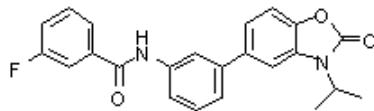

13CNMR 6m, DMSO

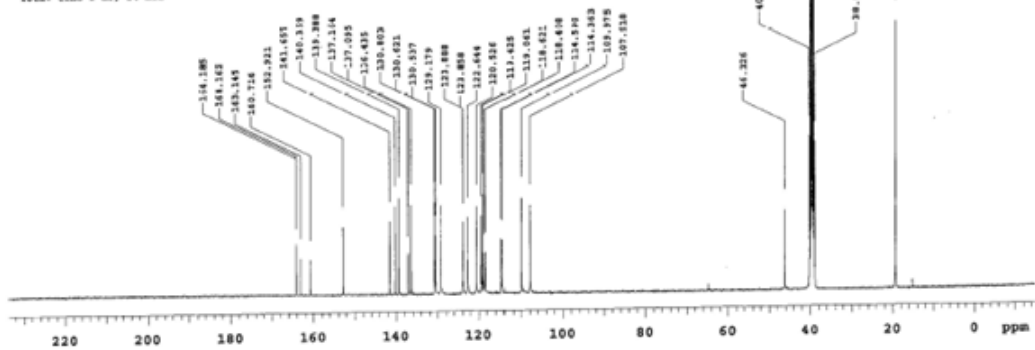

Figure 14: (6n)

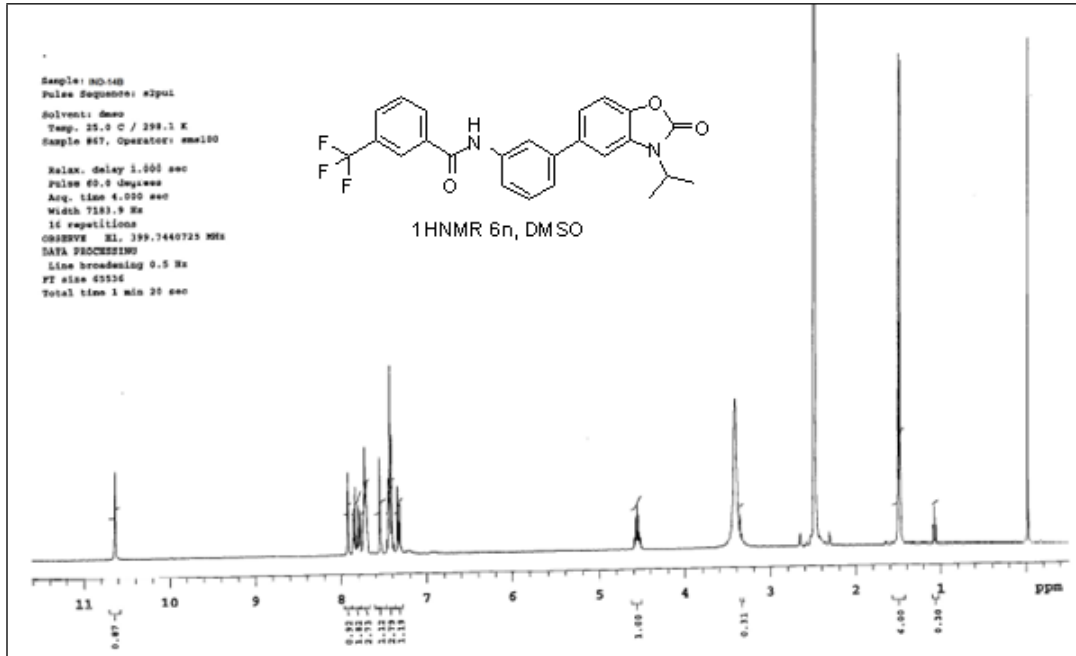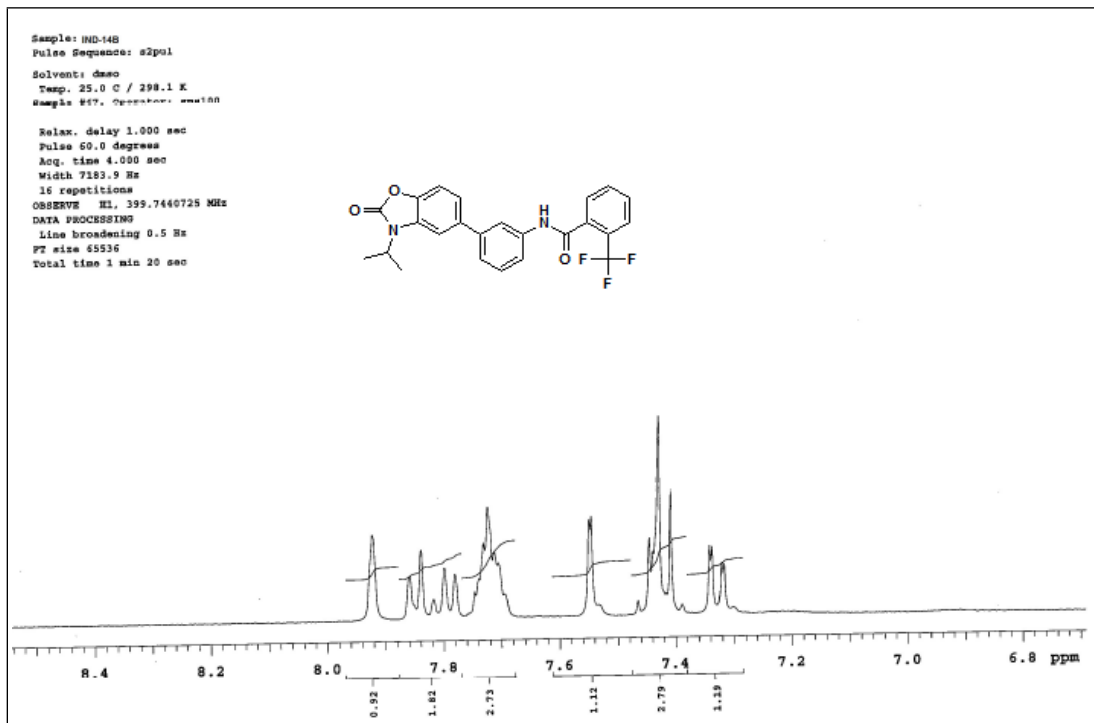

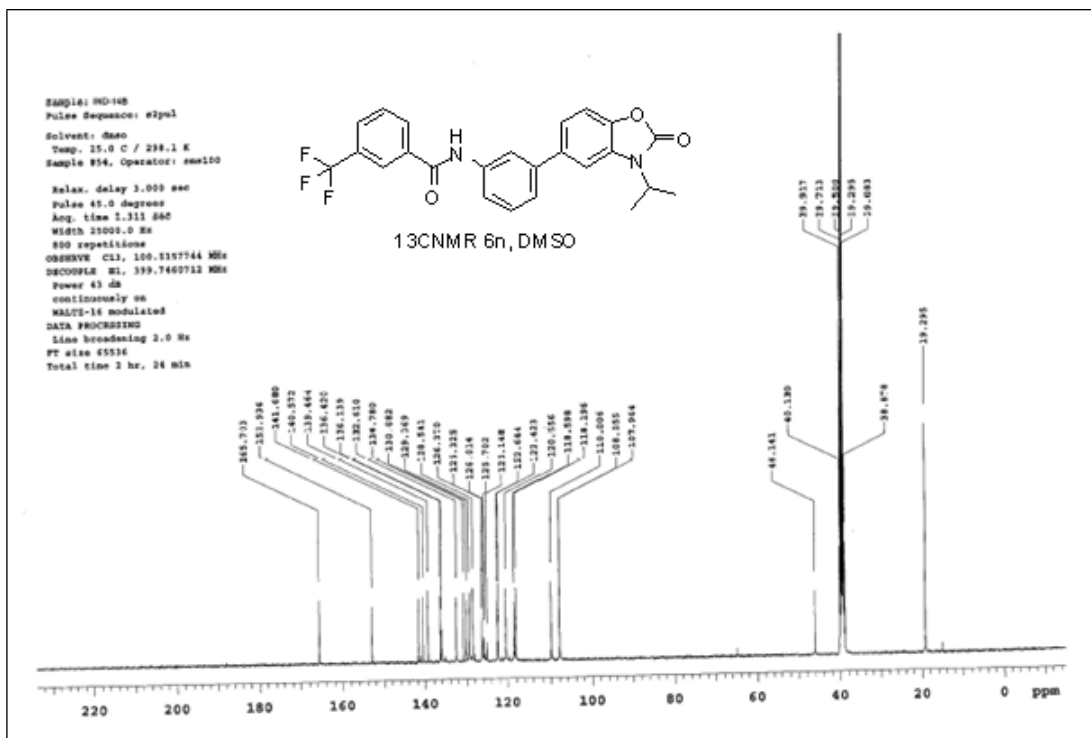

Figure 15: (6o)

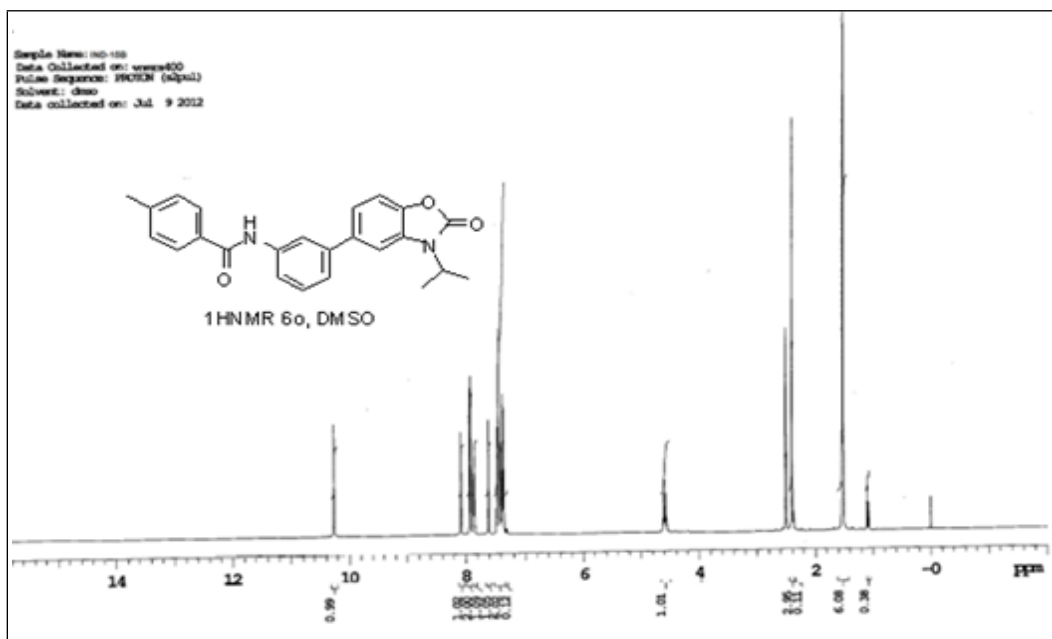

Sample Name: 100-158  
Data Collected on: vnmr400  
Pulse Sequence: zgpg30 (cpul)  
Solvent: dms  
Data collected on: Jul 9 2012

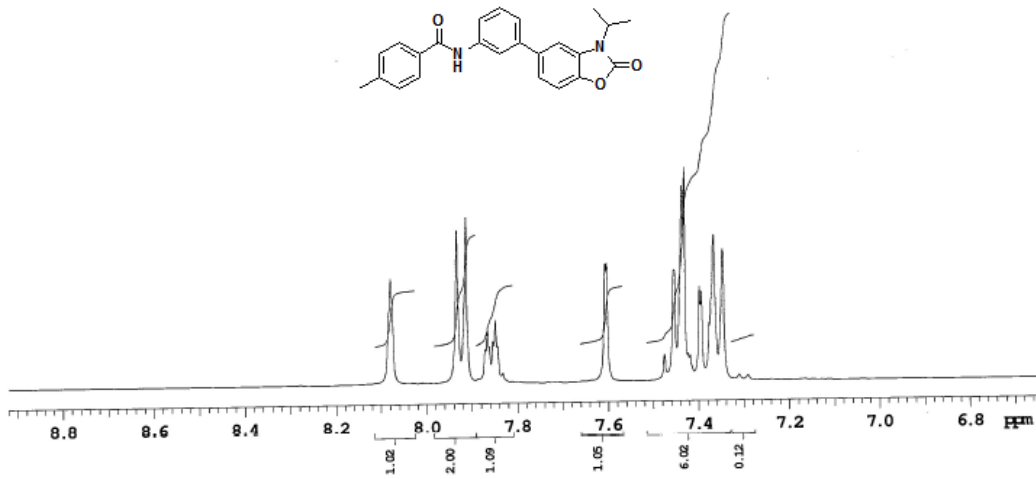

Sample Name: 100-158  
Data Collected on: vnmr400  
Pulse Sequence: zgpg30 (cpul)  
Solvent: dms  
Data collected on: Jul 9 2012

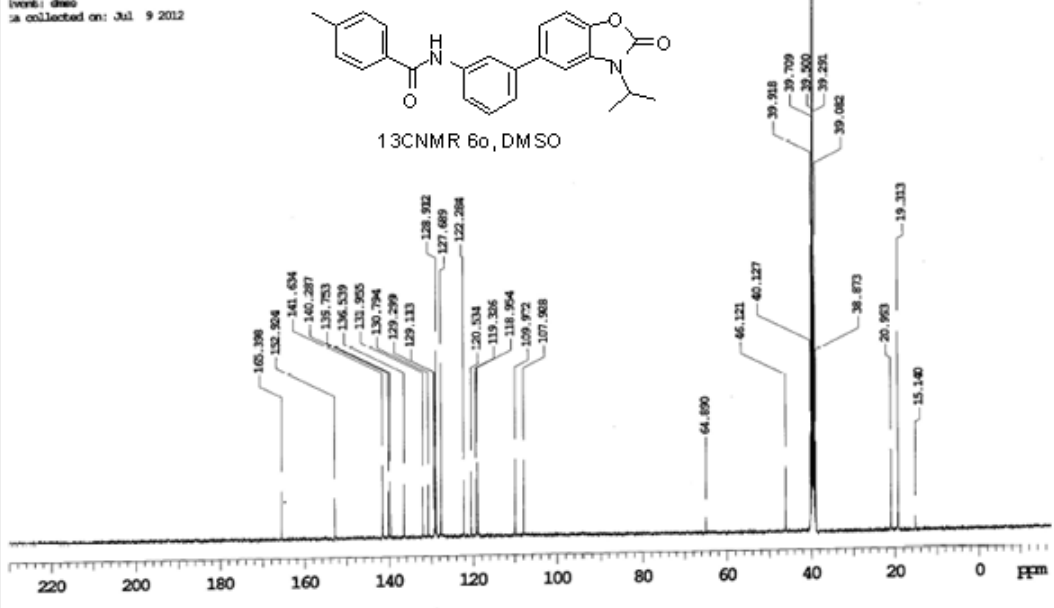

Figure 16: (6p)

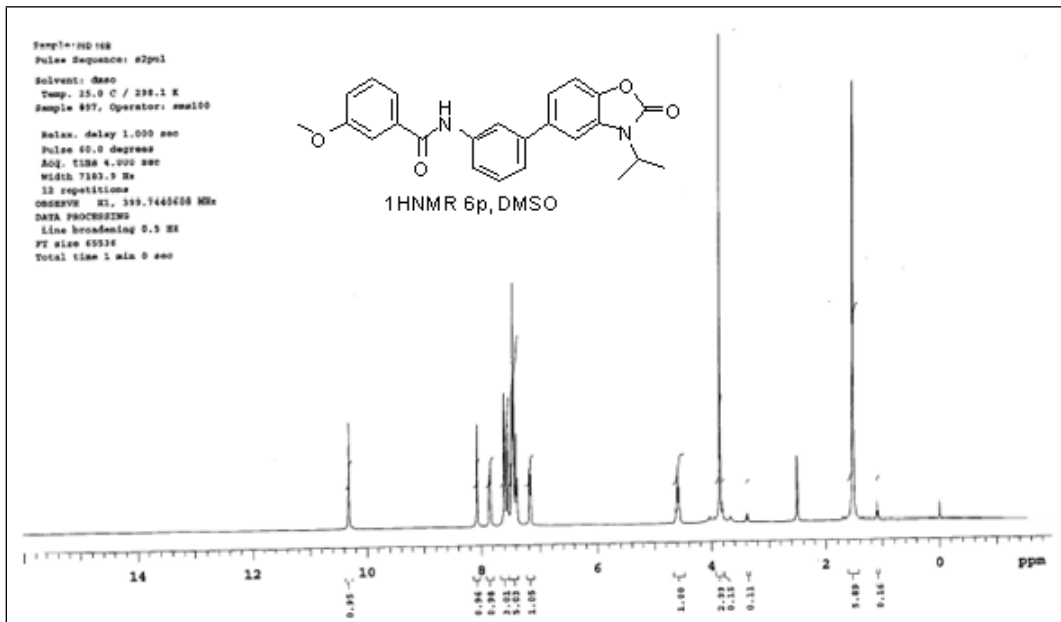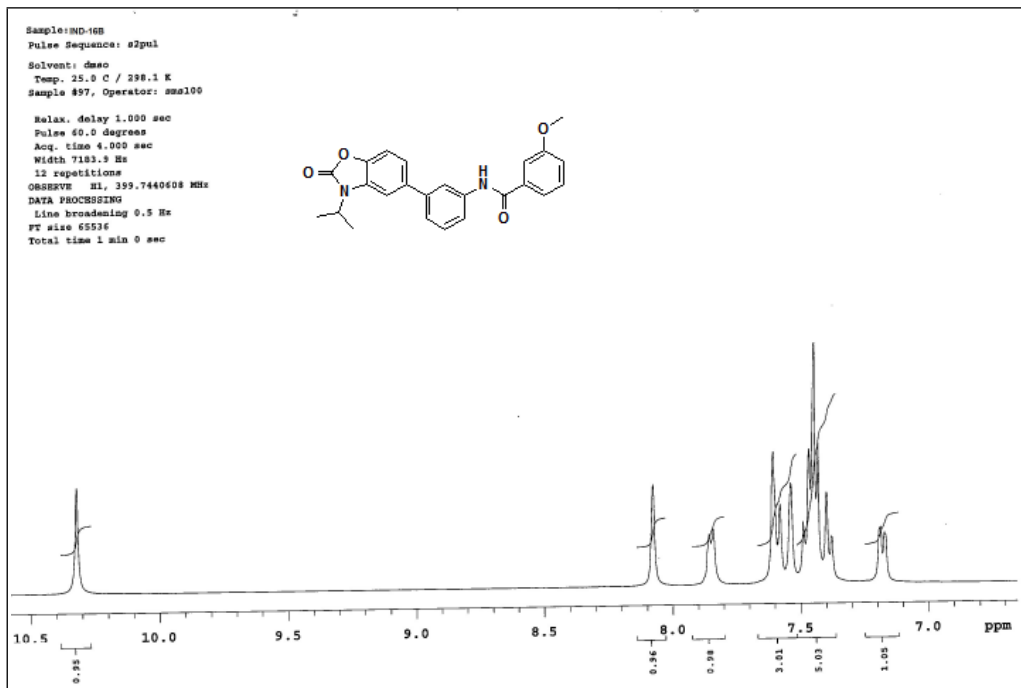



Sample: ND-778  
 Pulse Sequence: zgpg30  
 Solvent: dmsc  
 Temp: 25.0 C / 298.1 K  
 Sample #: Operator: am100  
  
 RELAX: delay 1.000 sec  
 Pulse 60.0 degrees  
 Acq. time 4.000 sec  
 Width 7183.9 Hz  
 12 repetitions  
 OBSERVE F1, 399.7440725 MHz  
 DATA PROCESSING  
 Line broadening 0.5 Hz  
 FT size 65536  
 Total time 1 min 0 sec

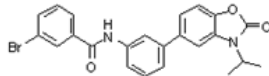

1HNMR 6q, DMSO

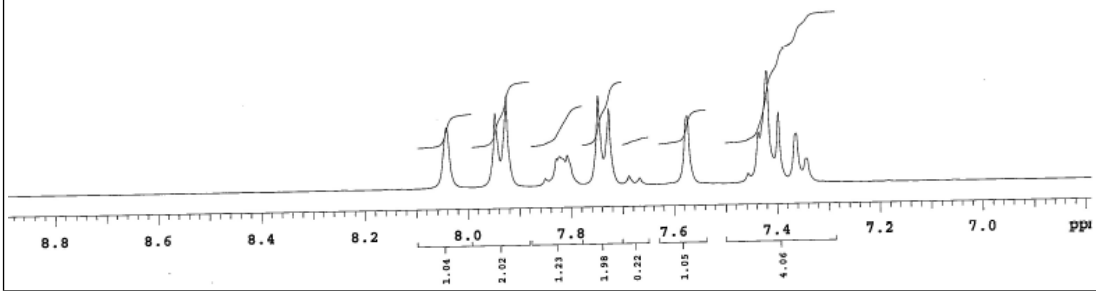

Sample: ND-778  
 Pulse Sequence: zgpg30  
 Solvent: dmsc  
 Temp: 25.0 C / 298.1 K  
 Sample #: Operator: am100  
  
 Relax: delay 3.000 sec  
 Pulse 45.0 degrees  
 Acq. time 1.311 840  
 Width 25000.0 Hz  
 3400 repetitions  
 OBSERVE C13, 100.6157792 MHz  
 SFOCUS: F1, 399.7440712 MHz  
 Power 45 dB  
 continuously on  
 WALTZ-16 Modulated  
 DATA PROCESSING  
 Line broadening 3.0 Hz  
 FT size 45536  
 Total time 4 hr, 19 min

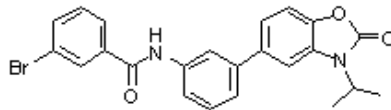

13CNMR 6q, DMSO

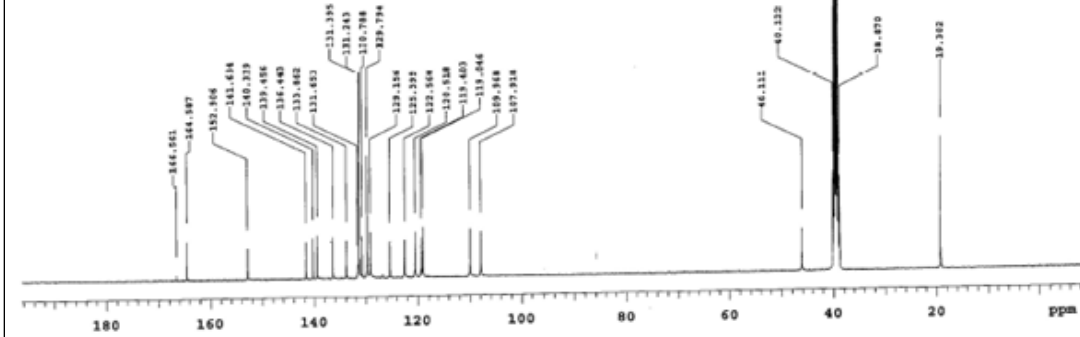



Figure 18: (6r)

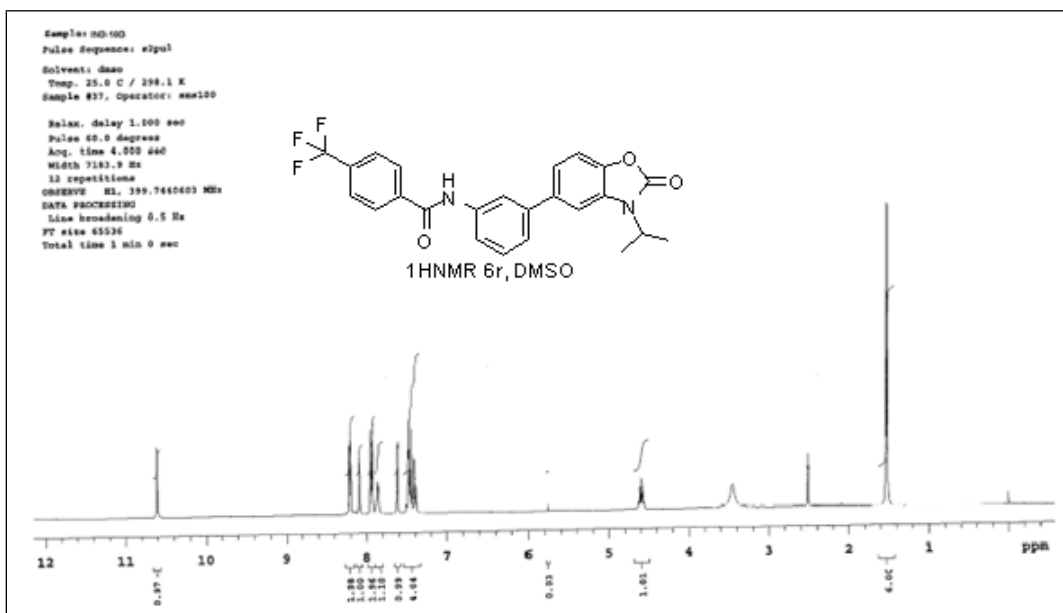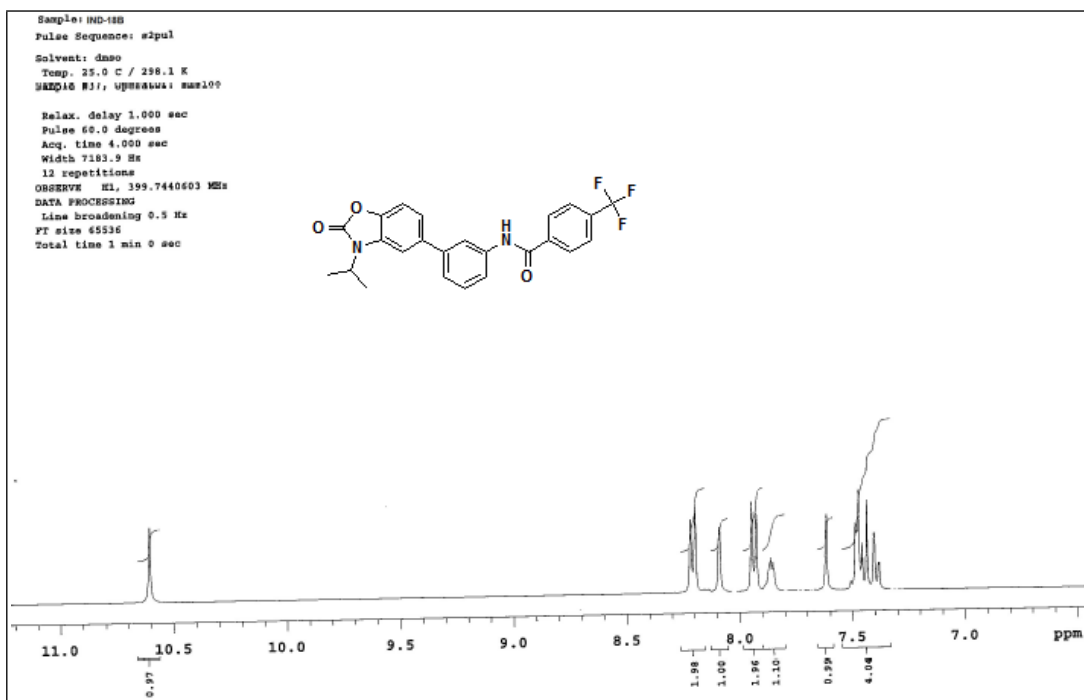

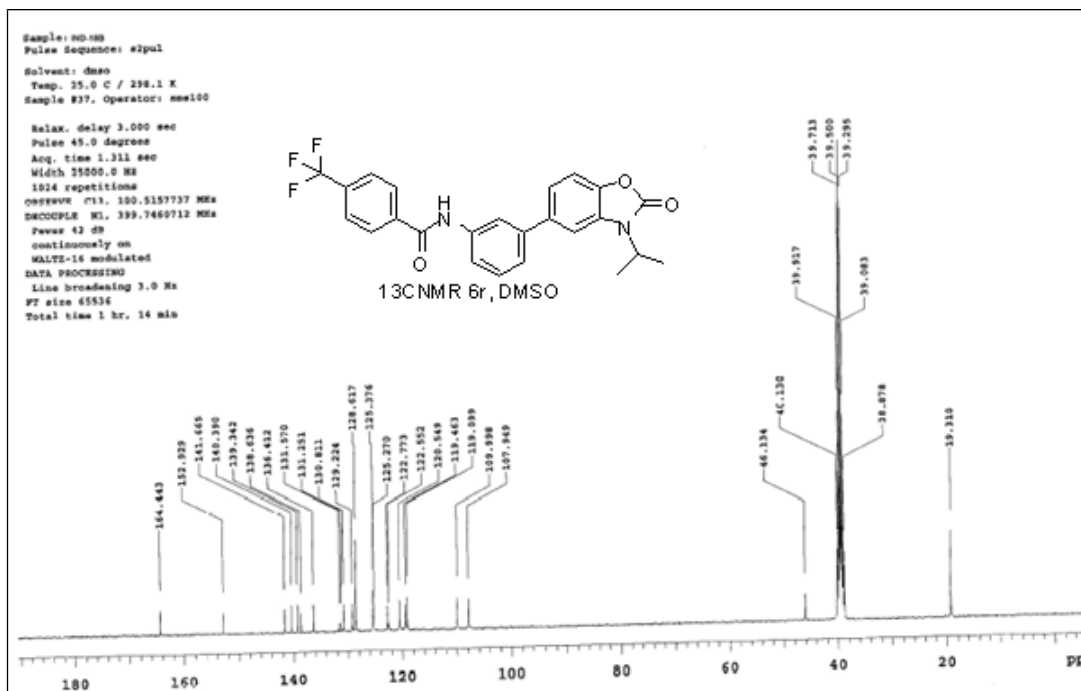

Figure 19: (6s)

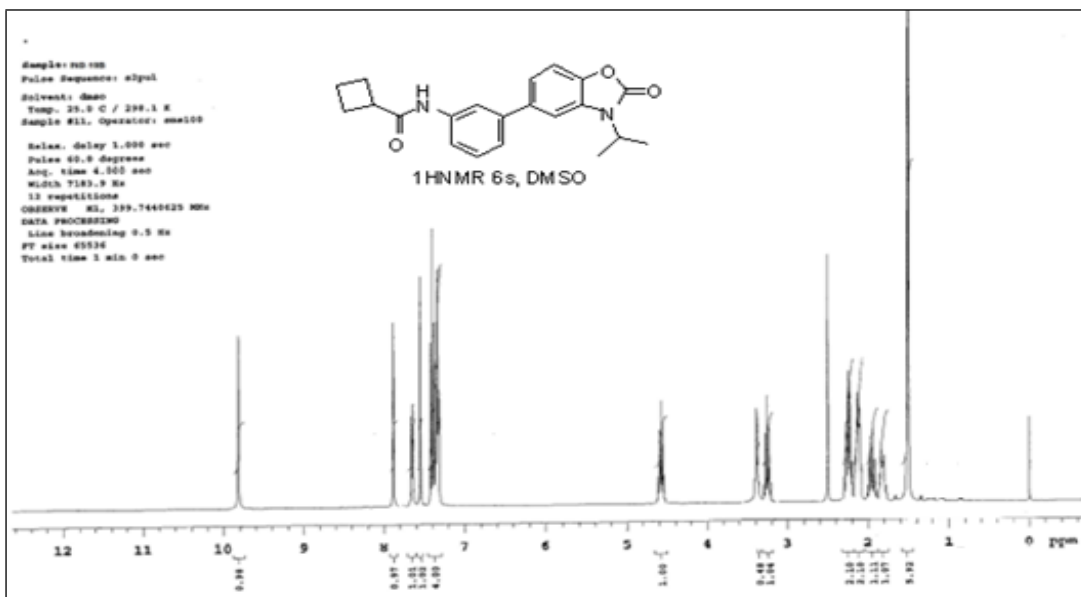

Sample: ND-100  
 Pulse Sequence: s2pul  
 Solvent: dmsc  
 Temp. 25.0 C / 298.1 K  
 Sample #11, Operator: sm100  
  
 Relax. delay 1.000 sec  
 Pulse 60.0 degrees  
 Acq. time 4.000 sec  
 Width 7183.9 Hz  
 12 repetitions  
 OBSERVE CH, 399.7440625 MHz  
 DATA PROCESSING  
 Line broadening 0.5 Hz  
 FT size 65536  
 Total time 1 min 0 sec

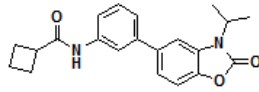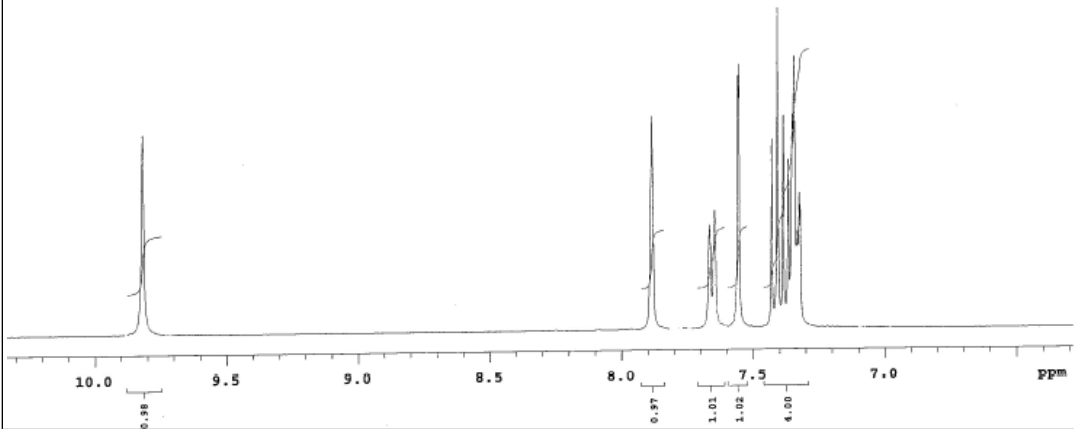

Sample: ND-100  
 Pulse Sequence: s2pul  
 Solvent: dmsc  
 Temp. 25.0 C / 298.1 K  
 Sample #11, Operator: sm100  
  
 Relax. delay 3.000 sec  
 Pulse 45.0 degrees  
 Acq. time 1.311 sec  
 Width 25000.0 Hz  
 1500 repetitions  
 OBSERVE CH, 100.5157703 MHz  
 DECOUPLE CH, 399.7440712 MHz  
 Power 43 dB  
 continuously on  
 WALTZ-16 Modulated  
 DATA PROCESSING  
 Line broadening 2.0 Hz  
 FT size 65536  
 Total time 1 hr, 48 min

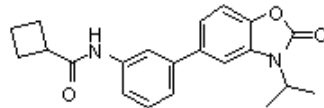

<sup>13</sup>CNMR 6s, DMSO

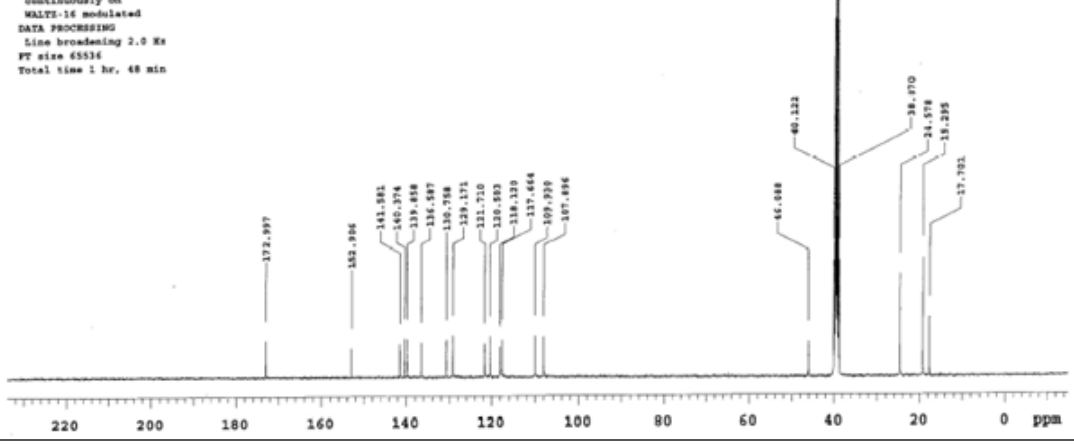

Figure 20: (6t)

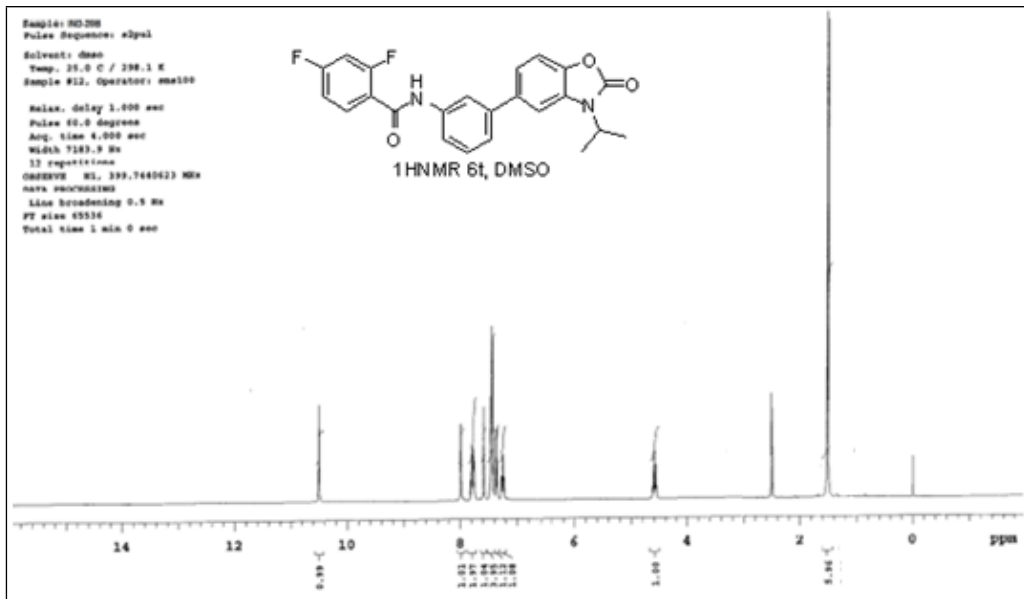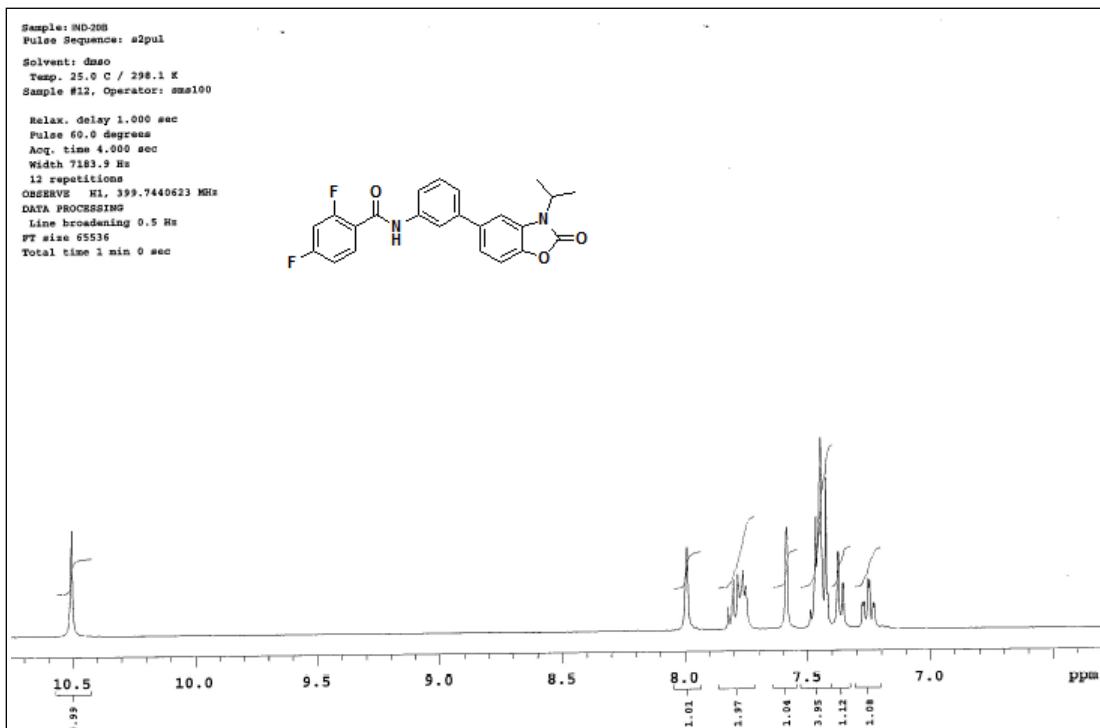



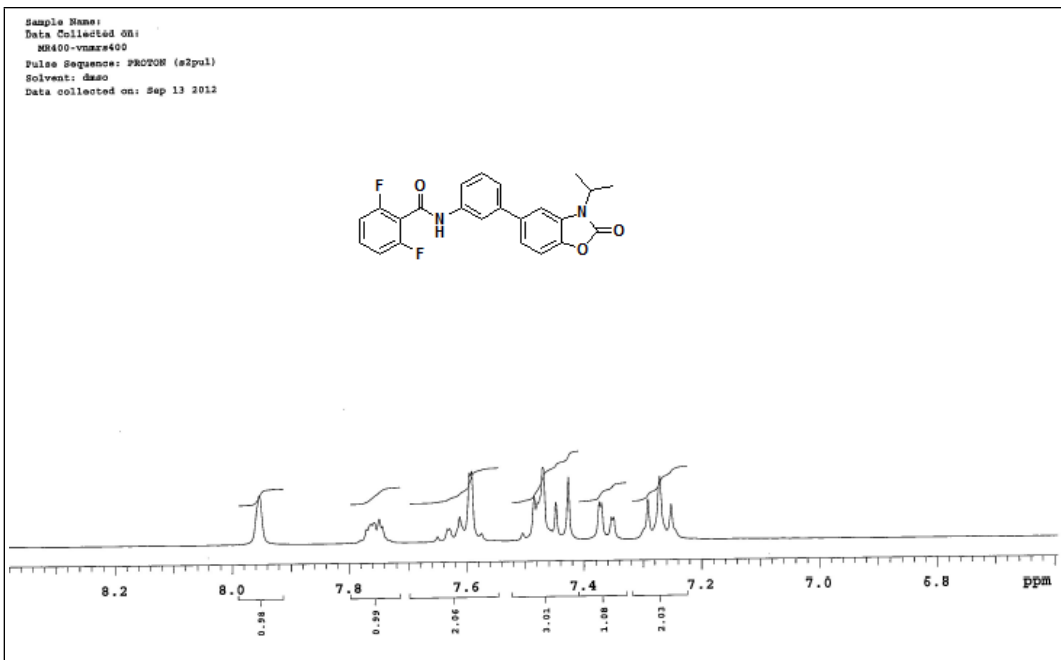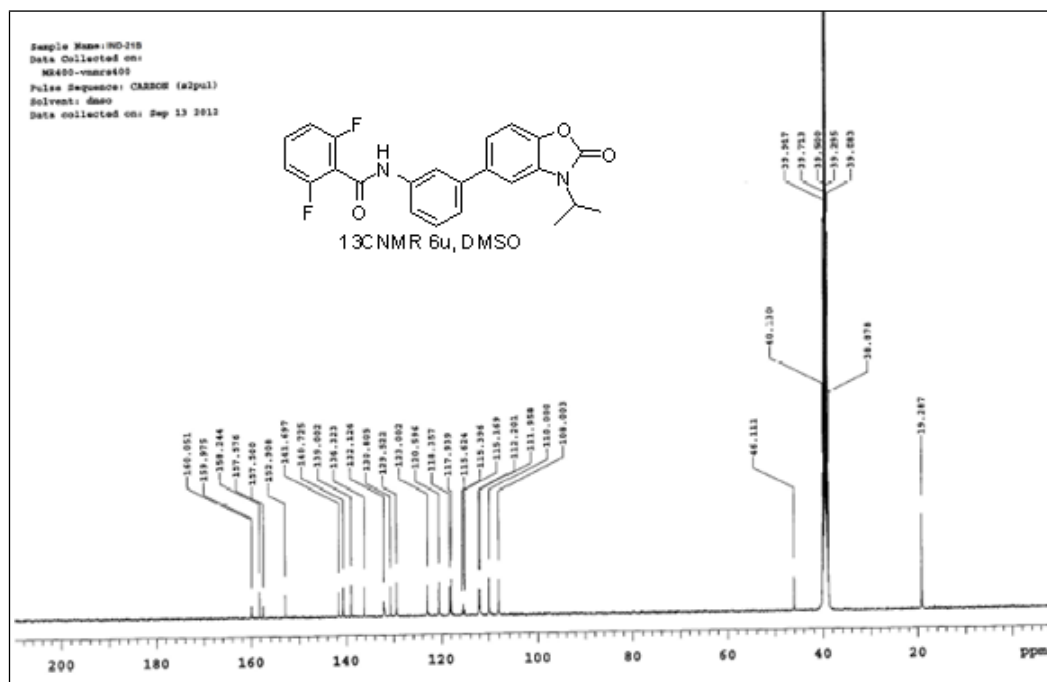

Figure 22: (6v)







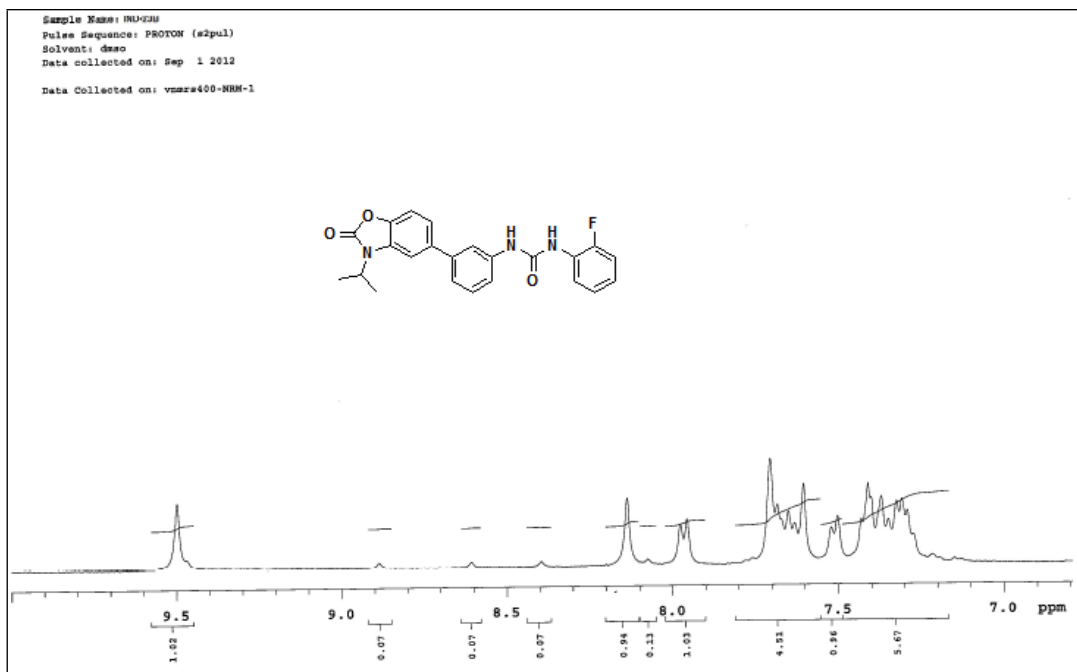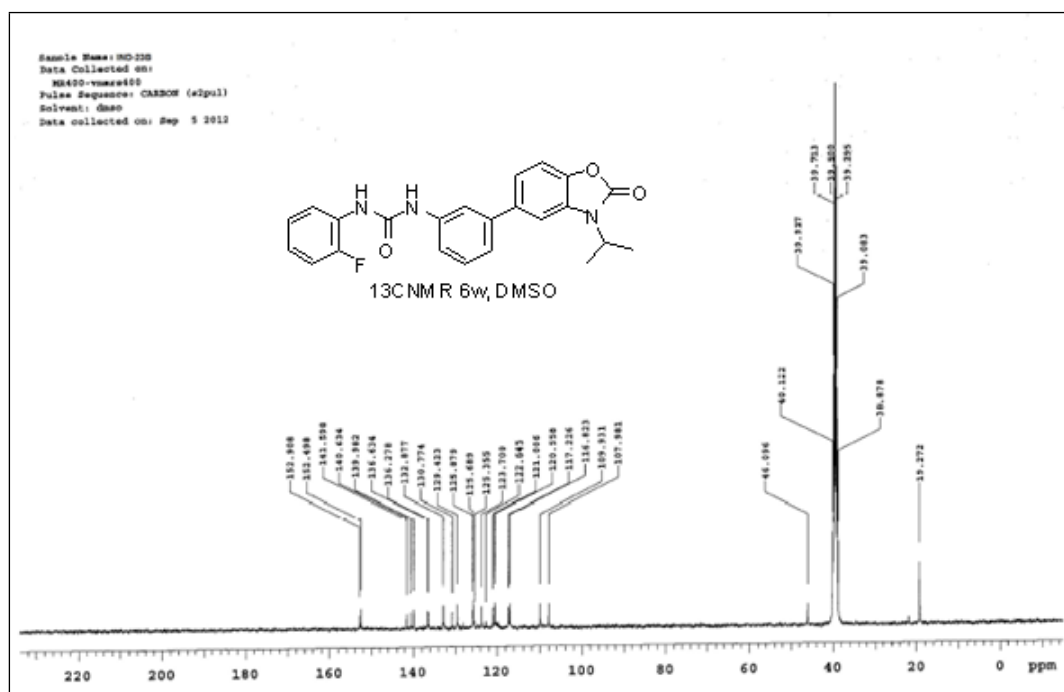

Figure 24: (6x)

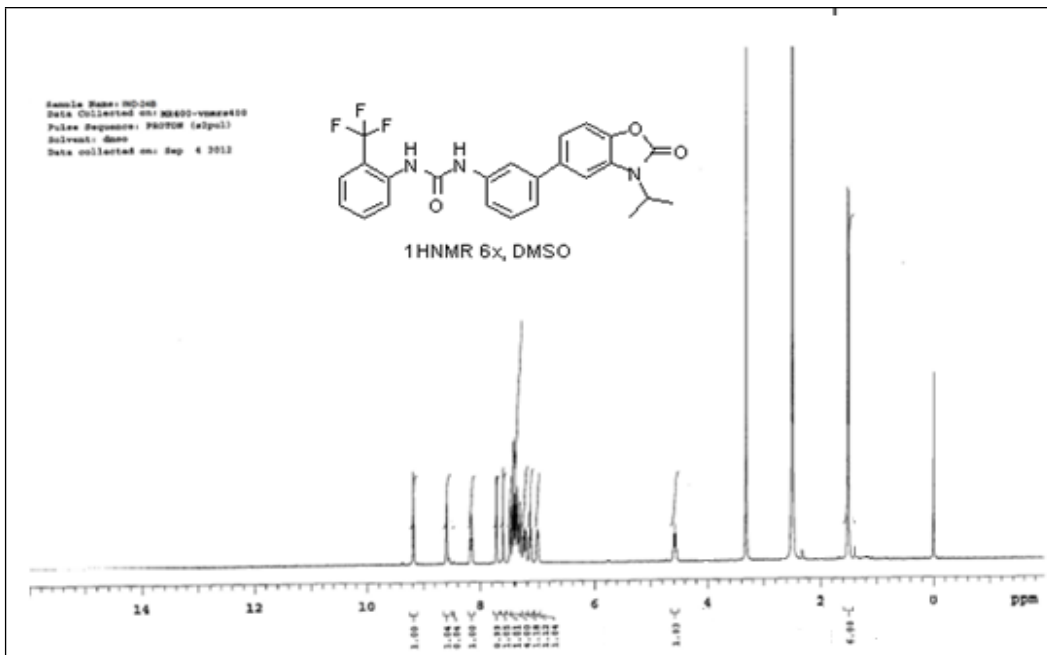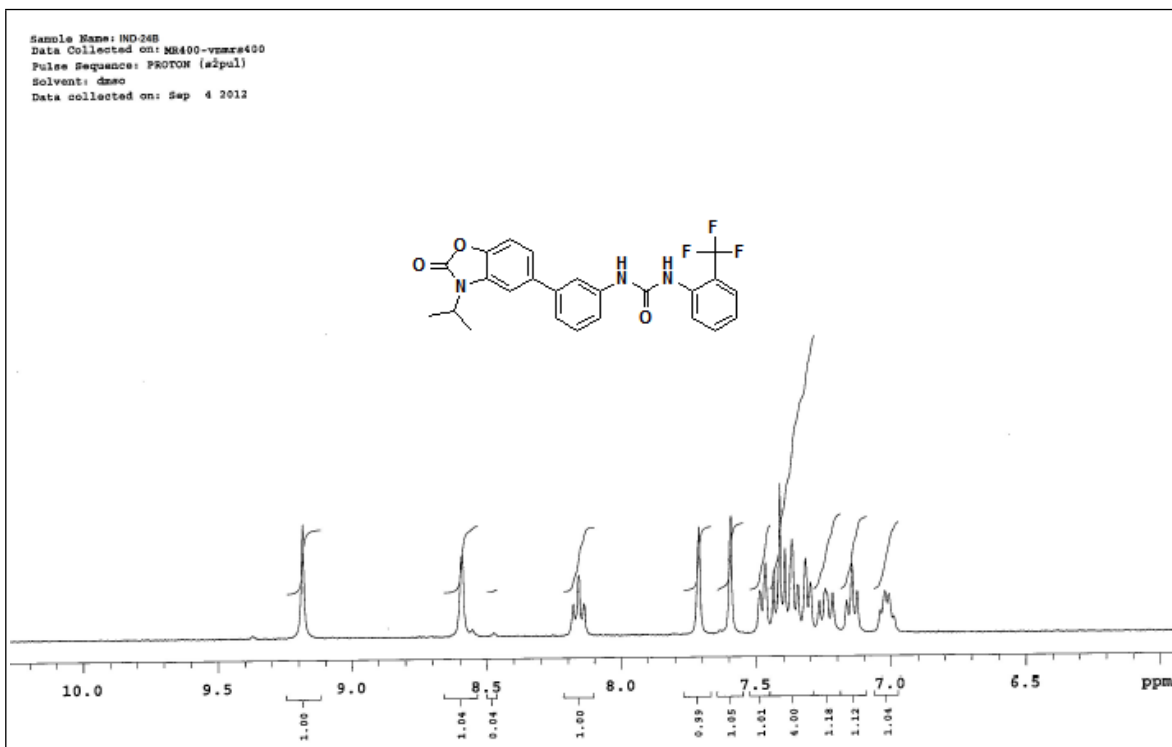

Sample Name: IND-248  
Data Collected on: MR400-vmsr450  
Pulse Sequence: CARBON (s2pul)  
Solvent: dms0  
Data collected on: Sep 5 2012

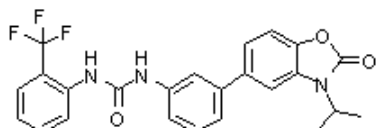

<sup>13</sup>CNMR 6x, DMSO

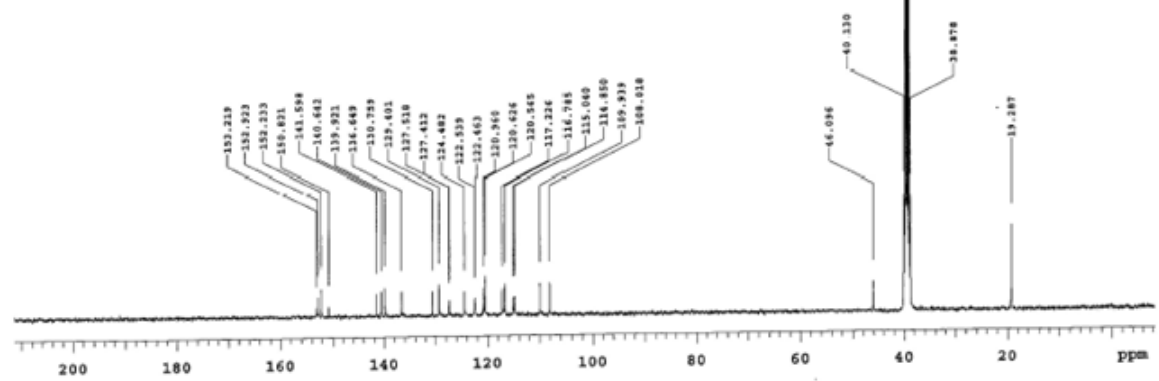

Supplement: c4ra07123a1.pdf [file c4ra07123a1.pdf]
